# Supplementary material for: Comparative transcriptome profiles of Schistosoma japonicum larval stages: Implications for parasite biology and host invasion
Source: PLoS Negl Trop Dis. 2022 Jan 13;16(1):e0009889. doi: 10.1371/journal.pntd.0009889 (PMC8791509; doi:10.1371/journal.pntd.0009889)
Supplement: S3 Table — (XLSX) [file pntd.0009889.s010.xlsx]

## Sheet: SEG in Egg
GeneID	Gene annotation	Transcript abudance at this stage (TPM)
Sjc_0002275	Similar to RNALX: Intracellular ribonuclease LX (Solanum lycopersicum OX%3D4081)	942.6
Sjc_0001505	hypothetical protein	619.727
Sjc_0005641	Immunogenic miracidial antigen 8I'	527.23
Sjc_0000895	Similar to ANPEP: Aminopeptidase N (Homo sapiens OX%3D9606)	502.357
Sjc_0007539	NADH:ubiquinone oxidoreductase complex I intermediate-associated protein 30,domain-containing protein	475.017
Sjc_0001889	Gamma-crystallin related domain-containing protein	278.66
Sjc_0003804	SJCHGC04358 protein	138.98
Sjc_0008066	Similar to Slc7a6: Y+L amino acid transporter 2 (Mus musculus OX%3D10090)	108.883
Sjc_0000176	tetraspanin, putative	76.9333
Sjc_0002265	Ribonuclease Oy	70.3933
Sjc_0000920	Similar to A12: Tegument antigen (Schistosoma mansoni OX%3D6183)	64.6667
Sjc_0006663	Similar to Comtd1: Catechol O-methyltransferase domain-containing protein 1 (Mus musculus OX%3D10090)	61.4033
Sjc_0006662	Similar to Comtd1: Catechol O-methyltransferase domain-containing protein 1 (Mus musculus OX%3D10090)	49.61
Sjc_0009320	SJCHGC08770 protein	48.6233
Sjc_0004607	Protein of unknown function	45.1867
Sjc_0002239	SJCHGC09830 protein	37.0533
Sjc_0007123	Similar to Kunitz-type serine protease inhibitor conotoxin Cal9.1a (Californiconus californicus OX%3D1736779)	35.86
Sjc_0002272	Ribonuclease Oy	35.14
Sjc_0001496	hypothetical protein	30.7233
Sjc_0005064	Protein of unknown function	26.8767
Sjc_0002281	Ribonuclease T2,domain-containing protein	26.23
Sjc_0007169	Similar to tpst-1: Protein-tyrosine sulfotransferase A (Caenorhabditis elegans OX%3D6239)	24.5267
Sjc_0008114	Similar to Venom allergen 5 (Vespa magnifica OX%3D202807)	23.1267
Sjc_0002263	Ribonuclease T2,domain-containing protein	19.08
Sjc_0001503	hypothetical protein	15.3467
Sjc_0008115	Similar to Venom allergen 5 (Vespa magnifica OX%3D202807)	15.0467
Sjc_0006506	Similar to TUBA1A: Tubulin alpha-1A chain (Cricetulus griseus OX%3D10029)	14.9733
Sjc_0002270	SJCHGC06710 protein	14.8767
Sjc_0002296	Ribonuclease T2,domain-containing protein	13.2433
Sjc_0009167	Similar to Slc18a2: Synaptic vesicular amine transporter (Mus musculus OX%3D10090)	12.3933
Sjc_0002258	Ribonuclease T2,domain-containing protein	10.2033
Sjc_0005450	hypothetical protein	7.75333
Sjc_0002182	muscleblind protein 1	7.74333
Sjc_0007480	Similar to NLRC5: Protein NLRC5 (Homo sapiens OX%3D9606)	6.74667
Sjc_0007881	EF-hand calcium-binding domain-containing protein 6	6.61
Sjc_0003683	hypothetical transcript	6.60333
Sjc_0007508	Similar to ccdc39: Coiled-coil domain-containing protein 39 (Xenopus tropicalis OX%3D8364)	6.17333
Sjc_0008772	golgin subfamily A member 6 6	5.13667
Sjc_0002158	hypotheticial protein	5.12
Sjc_0002052	hypothetical protein	5.10333
Sjc_0005422	Similar to CFAP58: Cilia- and flagella-associated protein 58 (Homo sapiens OX%3D9606)	4.9
Sjc_0007021	cAMP-dependent protein kinase regulatory subunit	4.84667
Sjc_0008654	Mitogen-activated protein kinase 15	4.72667
Sjc_0008318	Random slug protein 5	4.66667
Sjc_0005802	Similar to Cfap57: Cilia- and flagella-associated protein 57 (Mus musculus OX%3D10090)	4.4
Sjc_0001410	Similar to Calmodulin (Renilla reniformis OX%3D6136)	4.16
Sjc_0005349	hypothetical protein	4.15667
Sjc_0002626	unnamed protein product	4.08333
Sjc_0008653	Similar to mapk-15: Mitogen-activated protein kinase 15 (Caenorhabditis elegans OX%3D6239)	3.88333
Sjc_0006199	Similar to KIF17: Kinesin-like protein KIF17 (Homo sapiens OX%3D9606)	3.76667
Sjc_0006655	SJCHGC08540 protein	3.75333
Sjc_0006798	Similar to ESG-2A: Eggshell protein 2A (Schistosoma japonicum OX%3D6182)	2.98333
Sjc_0008845	hypotheticial protein	2.89333
Sjc_0003289	Similar to Frk: Tyrosine-protein kinase FRK (Rattus norvegicus OX%3D10116)	2.85
Sjc_0001986	caspase 8	2.62333
Sjc_0009533	SJCHGC06793 protein	2.59333
Sjc_0008808	SJCHGC09041 protein	2.54
Sjc_0005806	Similar to Scarb2: Lysosome membrane protein 2 (Mus musculus OX%3D10090)	2.52
Sjc_0000888	hypothetical protein	2.51
Sjc_0001509	hypothetical protein	2.31
Sjc_0003483	Similar to Kif9: Kinesin-like protein KIF9 (Mus musculus OX%3D10090)	2.25333
Sjc_0007792	Alpha-(1,6)-fucosyltransferase (EC 2.4.1.68) (Glycoprotein 6-alpha-L-fucosyltransferase) (GDP-fucose--glycoprotein fucosyltransferase) (GDP-L-Fuc:N-acetyl-beta-D-glucosaminide alpha1,6-fucosyltransferase) (alpha1-6FucT) (Fucosyltransferase 8), putative	1.98
Sjc_0000729	Similar to PPP2R5D: Serine/threonine-protein phosphatase 2A 56 kDa regulatory subunit delta isoform (Homo sapiens OX%3D9606)	1.92333
Sjc_0000104	hypothetical protein	1.87333
Sjc_0009302	Similar to Wdr93: WD repeat-containing protein 93 (Mus musculus OX%3D10090)	1.86667
Sjc_0005554	Kinesin heavy chain	1.84
Sjc_0004575	SJCHGC02646 protein	1.81
Sjc_0006055	Leucine-rich repeat protein	1.79667
Sjc_0009028	hypothetical protein	1.77667
Sjc_0004308	putative dna double-strand break repair rad50 ATPase	1.77
Sjc_0009321	hypothetical protein	1.76333
Sjc_0000258	hypothetical protein	1.74333
Sjc_0006856	hypothetical protein	1.47333
Sjc_0006637	Similar to Lmln: Leishmanolysin-like peptidase (Mus musculus OX%3D10090)	1.46
Sjc_0008438	Cell wall integrity and stress response component 1 precursor	1.45333
Sjc_0004611	Protein of unknown function	1.44667
Sjc_0006799	Similar to ESG-2A: Eggshell protein 2A (Schistosoma japonicum OX%3D6182)	1.43
Sjc_0009572	Similar to CP422: Egg protein CP422 (Schistosoma japonicum OX%3D6182)	1.41
Sjc_0008657	hypothetical protein	1.37667
Sjc_0004592	Polymorphic mucin variant IC-r2/1-3.2	1.36667
Sjc_0009385	Diuretic hormone receptor	1.35333
Sjc_0004585	Polymorphic mucin variant IC-r2/1-3.2	1.29667
Sjc_0000325	hypothetical protein	1.26667
Sjc_0006226	histone arginine demethylase JMJD6	1.20667
Sjc_0009448	Coiled-coil domain-containing protein	1.20333
Sjc_0005622	Similar to rbm46: Probable RNA-binding protein 46 (Danio rerio OX%3D7955)	1.19333
Sjc_0005630	Similar to rbm46: Probable RNA-binding protein 46 (Danio rerio OX%3D7955)	1.19333
Sjc_0005131	hypothetical protein	1.17333
Sjc_0004734	Similar to TRPM6: Transient receptor potential cation channel subfamily M member 6 (Homo sapiens OX%3D9606)	1.16667
Sjc_0005857	Similar to A1CF: APOBEC1 complementation factor (Homo sapiens OX%3D9606)	1.03667
Sjc_0008652	Similar to mapk15: Mitogen-activated protein kinase 15 (Xenopus laevis OX%3D8355)	1.03667
Sjc_0002156	Protein of unknown function	1.01667
Sjc_0004560	hypothetical protein	0.993333
Sjc_0002448	Similar to Dnah3: Dynein heavy chain 3%2C axonemal (Mus musculus OX%3D10090)	0.93

## Sheet: EEG in Egg
GeneID	Gene annotation	Transcript abudance at this stage (TPM)	log2FoldChange
Sjc_0009568	Similar to CP422: Egg protein CP422	25915.4	6.25132
Sjc_0009570	Similar to CP422: Egg protein CP422	9974.66	9.53362
Sjc_0009571	Similar to CP422: Egg protein CP422	7979.51	6.37811
Sjc_0001502	hypothetical protein	4349.87	11.5347
Sjc_0005639	Immunogenic miracidial antigen 8I'	1735.4	11.1445
Sjc_0005642	Similar to 8I: Immunogenic miracidial antigen 8I	1670.47	10.7079
Sjc_0004969	SJCHGC07515 protein	1392.57	5.39139
Sjc_0001961	Dentin sialophosphoprotein precursor	1288.39	2.71907
Sjc_0008439	Cell wall integrity and stress response component 1 precursor	1081.28	10.4908
Sjc_0000405	Similar to Dynein light chain LC6%2C flagellar outer arm	1049.77	5.34618
Sjc_0008169	Similar to GLIPR1L2: GLIPR1-like protein 2	982.117	10.746
Sjc_0003958	Similar to Globin	891.327	6.21094
Sjc_0009409	Similar to AQP9: Aquaporin-9	873.993	4.70936
Sjc_0008538	Similar to Thioredoxin peroxidase	867.107	2.58854
Sjc_0006633	Similar to TUBB4B: Tubulin beta-4B chain	625.69	5.98445
Sjc_0007960	Glutenin high molecular weight subunit DX5 precursor	449.003	10.1549
Sjc_0002181	Similar to TUBA1D: Tubulin alpha-1D chain	429.353	6.65785
Sjc_0000882	Similar to Dynein light chain LC6%2C flagellar outer arm	423.037	6.30301
Sjc_0001960	hypothetical protein	391.26	3.85761
Sjc_0003766	Similar to Glutathione S-transferase class-mu 28 kDa isozyme	342.7	2.51856
Sjc_0008437	Cell wall integrity and stress response component 1 precursor	341.743	9.7814
Sjc_0002312	Ribonuclease Oy	340.693	10.6702
Sjc_0002728	Similar to EIF4A3: Eukaryotic initiation factor 4A-III	313.217	3.18581
Sjc_0007961	SJCHGC02860 protein	297.987	8.17585
Sjc_0003702	Similar to MEIG1: Meiosis expressed gene 1 protein homolog	248.807	2.55754
Sjc_0006372	SJCHGC06863 protein	247.487	2.52779
Sjc_0002262	ribonuclease S-7-like	235.603	8.6232
Sjc_0002546	heat shock factor-binding protein 1	225.647	3.24403
Sjc_0008440	sulfotransferase oxamniquine resistance	188	7.70996
Sjc_0009183	Similar to rsph1: Radial spoke head 1 homolog	184.13	4.00045
Sjc_0001370	SJCHGC08923 protein	153.417	2.83466
Sjc_0001127	hypothetical protein	149.283	3.15542
Sjc_0006653	Estrogen-regulated protein EP45 precursor	144.27	5.47298
Sjc_0004059	Similar to dnaJ: Chaperone protein DnaJ	138.673	3.61122
Sjc_0007630	hypothetical protein	125.84	6.58672
Sjc_0002573	Similar to GPD1L: Glycerol-3-phosphate dehydrogenase 1-like protein	122.26	4.43084
Sjc_0006652	Similar to Serpinf2: Alpha-2-antiplasmin	116.527	4.65807
Sjc_0001888	SJCHGC06578 protein	114.503	8.29343
Sjc_0007824	Visual pigment-like receptor peropsin	112.437	2.68596
Sjc_0002797	Similar to MYCBP: c-Myc-binding protein	110.797	3.47053
Sjc_0001386	hypothetical protein	107.757	3.60067
Sjc_0001520	SJCHGC02082 protein	93.8333	2.68984
Sjc_0009135	Similar to CDO: Cysteine dioxygenase	91.8	7.32967
Sjc_0004811	Similar to Cfap161: Cilia- and flagella-associated protein 161	86.1033	3.86454
Sjc_0009006	hypotheticial protein	84.0967	8.67266
Sjc_0003323	Similar to Bug22: Cilia- and flagella-associated protein 20	82.5433	3.48595
Sjc_0008278	Similar to CA12: Carbonic anhydrase 12	80.9633	2.39063
Sjc_0002206	Ribonuclease Oy	79.5333	6.75198
Sjc_0002120	Similar to DIP13: 13 kDa deflagellation-inducible protein	75.1933	3.29945
Sjc_0007950	Similar to Tekt2: Tektin-2	74.9133	2.63857
Sjc_0004857	Similar to CYB561: Cytochrome b561	74.06	2.38686
Sjc_0007417	Similar to Fbxo36: F-box only protein 36	71.1467	2.76412
Sjc_0004501	Similar to At1g30440: BTB/POZ domain-containing protein At1g30440	71.0267	2.93481
Sjc_0002508	Phospholipid scramblase 1	69.8667	4.07524
Sjc_0001887	Gamma-crystallin related domain-containing protein	66.8133	7.54599
Sjc_0006534	Similar to Nebl: LIM zinc-binding domain-containing Nebulette	65.19	3.99511
Sjc_0002282	Similar to Ribonuclease S-2	64.73	7.29052
Sjc_0003617	Similar to Plac8: Placenta-specific gene 8 protein	62.7367	5.01271
Sjc_0009034	putative deferrochelatase/peroxidase YfeX	62.2233	5.49287
Sjc_0002094	DM9 domain-containing protein	62.21	2.84352
Sjc_0008914	Similar to UPF0573 protein C2orf70 homolog B	62.1167	2.86155
Sjc_0007004	Similar to Efcab2: Dynein regulatory complex protein 8	59.5267	3.31595
Sjc_0001601	transcription factor mrg-related	59.1233	3.58348
Sjc_0003391	adenylate cyclase	57.4467	7.62987
Sjc_0004043	Similar to LACS4: Long chain acyl-CoA synthetase 4	54.68	3.09805
Sjc_0002194	Ribonuclease Oy	53.33	6.95998
Sjc_0002133	Similar to RAI14: Ankycorbin	51.9367	2.44021
Sjc_0009161	Similar to SLC18A2: Synaptic vesicular amine transporter	51.1533	4.80751
Sjc_0007720	serine/threonine kinase	50.8933	4.3023
Sjc_0003132	Similar to ccdc169: Coiled-coil domain-containing protein 169	50.8	2.63878
Sjc_0003588	Similar to Mfhas1: Malignant fibrous histiocytoma-amplified sequence 1 homolog	47.66	4.83835
Sjc_0008104	Similar to CTNS: Cystinosin	47.65	2.87957
Sjc_0005130	hypotheticial protein	47.0367	5.28626
Sjc_0004750	Similar to TEKT3: Tektin-3	46.2467	5.29269
Sjc_0009334	SJCHGC04243 protein	45.0067	2.55253
Sjc_0005913	Similar to ABCB1: Multidrug resistance protein 1	44.8233	3.16239
Sjc_0005285	SJCHGC07897 protein	43.77	6.15232
Sjc_0006022	Similar to Spag6: Sperm-associated antigen 6	42.7367	3.56732
Sjc_0006020	Similar to SLC26A6: Solute carrier family 26 member 6	41.51	2.94852
Sjc_0002333	Similar to ENKUR: Enkurin	41.1033	3.73204
Sjc_0007049	Similar to ECE1: Endothelin-converting enzyme 1	40.6033	3.94945
Sjc_0000388	Similar to Gatm: Glycine amidinotransferase%2C mitochondrial	39.9433	3.11943
Sjc_0009451	Similar to TRX4: Thioredoxin H4	39.7233	4.70314
Sjc_0008694	Similar to C22orf23: UPF0193 protein EVG1	39.2967	3.91728
Sjc_0006568	Similar to Caltractin	38.83	3.07236
Sjc_0001422	Similar to TEKT1: Tektin-1	37.5167	2.3539
Sjc_0009068	Similar to Elovl7: Elongation of very long chain fatty acids protein 7	36.4433	2.39097
Sjc_0000843	Similar to RIBC2: RIB43A-like with coiled-coils protein 2	36.3967	2.91689
Sjc_0006024	Protein FAM81B	36.12	3.3029
Sjc_0003195	Similar to Nme5: Nucleoside diphosphate kinase homolog 5	35.3933	3.76062
Sjc_0003937	Similar to RHO: Rhodopsin	35.3833	4.17689
Sjc_0008415	hypothetical protein	35.1033	2.69443
Sjc_0006393	Similar to MDH1B: Putative malate dehydrogenase 1B	35.0667	2.39986
Sjc_0004442	Similar to SAMD15: Sterile alpha motif domain-containing protein 15	35	2.96103
Sjc_0009035	putative deferrochelatase/peroxidase YfeX	34.9333	4.46542
Sjc_0002240	SJCHGC09830 protein	34.3667	3.58739
Sjc_0007156	Similar to cfap77: Cilia- and flagella-associated protein 77	34.2833	3.00366
Sjc_0007113	Similar to moaC: Cyclic pyranopterin monophosphate synthase	34.0333	2.51144
Sjc_0008458	hypothetical protein	32.86	3.73597
Sjc_0003815	hypothetical protein	32.3133	4.54499
Sjc_0000523	Cilia- and flagella-associated protein	32.03	2.95814
Sjc_0002317	hypothetical protein	31.0967	2.85713
Sjc_0001404	Similar to Rsph6a: Radial spoke head protein 6 homolog A	30.51	2.59283
Sjc_0004353	SJCHGC03401 protein	30.4533	3.25217
Sjc_0003527	Similar to tekt4: Tektin-4	30.1367	3.50797
Sjc_0000171	Sperm surface protein Sp17	28.5533	2.98861
Sjc_0000810	Similar to MOGAT2: 2-acylglycerol O-acyltransferase 2	28.4567	2.60399
Sjc_0004741	hypotheticial protein	28.0367	3.00544
Sjc_0002771	TNN19371.1 Lymphocyte expansion molecule	27.8233	2.50963
Sjc_0008233	Similar to RSPH3: Radial spoke head protein 3 homolog	27.5733	3.64354
Sjc_0009295	Calmodulin	27.4333	3.14297
Sjc_0007110	Similar to Cyb5d1: Cytochrome b5 domain-containing protein 1	27.3867	2.55163
Sjc_0002252	Similar to 33 kDa inner dynein arm light chain%2C axonemal	27.0533	3.64663
Sjc_0007452	Similar to Ccdc96: Coiled-coil domain-containing protein 96	26.76	3.80896
Sjc_0003048	Similar to lge-1: Glycosyltransferase-like protein LARGE	26.35	3.84046
Sjc_0007344	IQ domain-containing protein	26.2667	3.05135
Sjc_0002745	Similar to CFAP52: Cilia- and flagella-associated protein 52	25.1767	3.42536
Sjc_0001214	Similar to CCDC151: Coiled-coil domain-containing protein 151	24.7533	2.53612
Sjc_0000285	Similar to Efhc1: EF-hand domain-containing protein 1	24.1967	2.39353
Sjc_0001271	Zinc finger FLYWCH type	24.1733	5.04639
Sjc_0003682	Similar to Mpeg1: Macrophage-expressed gene 1 protein	23.72	2.85276
Sjc_0007487	SJCHGC03186 protein	23.11	4.21478
Sjc_0008249	Similar to DNAL4: Dynein light chain 4%2C axonemal	23.0867	2.81922
Sjc_0001369	SJCHGC08923 protein	22.92	2.59503
Sjc_0004204	Similar to Iqcg: Dynein regulatory complex protein 9	22.5367	2.64912
Sjc_0000356	Protein TBATA	22.2	3.32816
Sjc_0007091	Similar to tpst-1: Protein-tyrosine sulfotransferase A	22.05	4.23145
Sjc_0002911	hypothetical protein	21.8767	2.88303
Sjc_0003403	DNA double-strand break repair rad50 ATPase	21.2633	5.14348
Sjc_0007094	Similar to tpst-1: Protein-tyrosine sulfotransferase A	19.9	5.13303
Sjc_0005534	SJCHGC05363 protein	19.8967	2.66706
Sjc_0006754	Similar to DDC: Aromatic-L-amino-acid decarboxylase	19.83	2.65758
Sjc_0007735	EF-hand calcium-binding domain-containing protein 10	19.5567	3.34765
Sjc_0000621	Similar to Crocc: Rootletin	19.2833	4.41041
Sjc_0008468	SJCHGC08880 protein	18.9367	2.43254
Sjc_0005281	Similar to CCDC173: Coiled-coil domain-containing protein 173	18.4433	3.27625
Sjc_0003189	Similar to FAM183A: Protein FAM183A	18.05	3.14629
Sjc_0004846	Similar to IQCA1: Dynein regulatory complex protein 11	17.8233	2.93108
Sjc_0004626	SJCHGC08715 protein	17.71	5.49079
Sjc_0006250	Similar to IFT25: Intraflagellar transport protein 25	17.53	2.49911
Sjc_0001729	A-kinase anchor protein 14	17.3167	3.73618
Sjc_0006616	putative microtubule-associated protein 9	16.9333	2.56335
Sjc_0004243	Similar to AK7: Adenylate kinase 7	16.7767	3.66917
Sjc_0008359	putative translation elongation factor G	16.77	2.93725
Sjc_0007701	Similar to morn3: MORN repeat-containing protein 3	16.7	4.47927
Sjc_0008097	Similar to Cercarial protease	16.66	4.5116
Sjc_0003538	Molybdopterin synthase sulfur carrier subunit	16.29	2.46506
Sjc_0002257	Similar to 33 kDa inner dynein arm light chain%2C axonemal	15.8467	3.79554
Sjc_0005047	Similar to ODA1: Outer dynein arm protein 1	15.7267	3.1628
Sjc_0000821	hypothetical protein	15.6067	5.01833
Sjc_0002238	SJCHGC09830 protein	15.4467	4.34304
Sjc_0007127	Similar to Dynein intermediate chain 2%2C ciliary	15.43	3.12992
Sjc_0001515	Similar to let-413: Protein lap1	15.4167	3.41816
Sjc_0007959	hypothetical protein	15.41	4.19136
Sjc_0007192	EF-hand calcium-binding domain-containing protein 5	15.0733	3.14212
Sjc_0004413	Synaptotagmin-14	14.7833	2.35275
Sjc_0000288	Similar to MNS1: Meiosis-specific nuclear structural protein 1	14.6133	2.56102
Sjc_0006929	hypothetical protein	14.5833	2.95588
Sjc_0007146	Similar to ARMC4: Armadillo repeat-containing protein 4	14.4367	2.49799
Sjc_0000154	Doublecortin domain-containing protein	13.92	4.81051
Sjc_0009113	Similar to Degs1: Sphingolipid delta	13.92	3.15698
Sjc_0008781	Similar to GAS8: Dynein regulatory complex subunit 4	13.7467	3.18338
Sjc_0005354	Similar to CCDC65: Dynein regulatory complex subunit 2	13.6767	3.34846
Sjc_0007024	Similar to UBXN11: UBX domain-containing protein 11	13.43	2.74256
Sjc_0005481	Similar to Calmodulin	13.4133	2.80828
Sjc_0007361	Similar to morn5: MORN repeat-containing protein 5	13.3767	2.3802
Sjc_0005141	Similar to ARMC3: Armadillo repeat-containing protein 3	13.15	2.52991
Sjc_0007799	trichoplein keratin filament-binding protein	12.87	2.35635
Sjc_0000759	Similar to slo-1: Calcium-activated potassium channel slo-1	12.8433	4.13027
Sjc_0004268	Similar to SPATA17: Spermatogenesis-associated protein 17	12.7633	3.75069
Sjc_0000347	Similar to CFAP299: Cilia- and flagella-associated protein 299	11.9567	2.64992
Sjc_0002928	Sperm-tail PG-rich repeat-containing protein 2	11.8833	2.40939
Sjc_0006264	Similar to LOXHD1: Lipoxygenase homology domain-containing protein 1	11.86	3.29913
Sjc_0007676	Similar to ATL10: RING-H2 finger protein ATL10	11.73	2.74115
Sjc_0002168	Similar to efhc2: EF-hand domain-containing family member C2	11.5967	3.42035
Sjc_0003393	adenylate cyclase	11.4133	4.20454
Sjc_0005667	cGMP-gated cation channel alpha-1-like	11.1933	4.3043
Sjc_0001911	Similar to nrf-6: Nose resistant to fluoxetine protein 6	11.1267	2.63222
Sjc_0006401	hypothetical protein	11.1	2.76963
Sjc_0007012	Similar to CFAP70: Cilia- and flagella-associated protein 70	10.6033	2.46941
Sjc_0004838	Similar to Tsnaxip1: Translin-associated factor X-interacting protein 1	10.3267	3.02613
Sjc_0002185	Protein STPG4	10.2933	3.8053
Sjc_0002170	Similar to DRC7: Dynein regulatory complex subunit 7	10.1967	3.20062
Sjc_0007214	Similar to ZSWIM2: E3 ubiquitin-protein ligase ZSWIM2	10.0633	3.10395
Sjc_0002512	Similar to MORN1: MORN repeat-containing protein 1	9.84667	2.65764
Sjc_0000435	SJCHGC08655 protein	9.83667	2.53358
Sjc_0009220	Hoglet	9.76	3.1795
Sjc_0006509	Similar to Ddc: Aromatic-L-amino-acid decarboxylase	9.68667	2.73966
Sjc_0008392	Similar to DNAAF1: Dynein assembly factor 1%2C axonemal	9.51	2.81902
Sjc_0005337	Similar to secG: Ankyrin repeat%2C PH and SEC7 domain containing protein secG	9.49667	3.23735
Sjc_0003513	Similar to ift57: Intraflagellar transport protein 57 homolog	9.28333	2.39274
Sjc_0005820	Similar to Tmprss4: Transmembrane protease serine 4	9.26333	3.73803
Sjc_0000943	SJCHGC04509 protein	9.22667	3.96832
Sjc_0008806	hypothetical protein MS3_02985	9.19333	4.11016
Sjc_0001452	Similar to B3GNT5: Lactosylceramide 1%2C3-N-acetyl-beta-D-glucosaminyltransferase	8.94333	4.41906
Sjc_0006148	protein FAM47E-like	8.87	3.22525
Sjc_0005527	Tetratricopeptide repeat protein	8.69	2.81374
Sjc_0008763	Similar to Lrguk: Leucine-rich repeat and guanylate kinase domain-containing protein	8.43	2.85194
Sjc_0002374	androglobin	8.21667	2.39984
Sjc_0007725	Similar to Ankef1: Ankyrin repeat and EF-hand domain-containing protein 1	7.46667	2.66998
Sjc_0008672	Similar to QRICH2: Glutamine-rich protein 2	7.41	3.38681
Sjc_0003484	Kinesin-like protein	7.39667	2.74195
Sjc_0001408	glutaredoxin 3	7.27	2.37753
Sjc_0007472	hypothetical protein	7.18333	2.61067
Sjc_0007978	Similar to FBXW10: F-box/WD repeat-containing protein 10	7.17333	3.92458
Sjc_0005132	hypothetical protein Smp_181330	7.17	3.91585
Sjc_0008668	glutamine rich 2	6.95333	3.53003
Sjc_0002060	Similar to ARRB1: Beta-arrestin-1	6.94	2.67177
Sjc_0003686	kinectin	6.60333	3.3973
Sjc_0004840	putative myosin heavy chain	6.47333	2.37215
Sjc_0006440	Similar to ropn1l: Ropporin-1-like protein	6.37333	2.81181
Sjc_0009484	hypothetical protein	6.37333	2.60359
Sjc_0002309	Similar to AK7: Adenylate kinase 7	6.35	2.6827
Sjc_0008777	Similar to SLC9A2: Sodium/hydrogen exchanger 2	6.10667	3.13343
Sjc_0005545	Similar to SPAG16: Sperm-associated antigen 16 protein	6.01	2.85068
Sjc_0008089	Similar to DRC1: Dynein regulatory complex protein 1	5.97333	2.43497
Sjc_0000719	vegetative incompatibility protein HET-E-1-like	5.79	3.31933
Sjc_0009112	Similar to ttm-5: Putative sphingolipid delta	5.53667	3.00579
Sjc_0000853	Similar to GCNT3: Beta-1%2C3-galactosyl-O-glycosyl-glycoprotein beta-1%2C6-N-acetylglucosaminyltransferase 3	5.43333	3.12953
Sjc_0000734	Similar to CFAP74: Cilia- and flagella-associated protein 74	5.40667	2.7514
Sjc_0009136	Similar to IQCH: IQ domain-containing protein H	5.40333	3.42351
Sjc_0008103	Lateral signaling target protein 2	5.36667	2.59109
Sjc_0006774	Regulator of G- signaling 22	5.30333	2.63879
Sjc_0009051	CCAAT-box DNA binding subunit B	5.16667	3.05785
Sjc_0003835	Similar to dzip1: Zinc finger protein Dzip1	5.16333	2.34123
Sjc_0002106	Homeobox protein OTX1 B	5.15	2.49203
Sjc_0007802	axonemal dynein light chain domain-containing protein 1-like	5.12333	3.17897
Sjc_0006887	Forkhead-associated domain-containing protein	4.5	2.88469
Sjc_0004776	Similar to Ccdc146: Coiled-coil domain-containing protein 146	4.49667	2.97119
Sjc_0005876	hypothetical protein	4.35	2.39116
Sjc_0004873	serine threonine- kinase TAO1-A	4.33333	2.75352
Sjc_0006896	Similar to SPO11: Meiotic recombination protein SPO11	4.15	2.4931
Sjc_0002308	Similar to AK7: Adenylate kinase 7	4.07	2.63397
Sjc_0003563	Similar to DRC3: Dynein regulatory complex subunit 3	4.07	2.96606
Sjc_0004136	Similar to AK9: Adenylate kinase 9	4.02333	2.83037
Sjc_0006213	Similar to Cfap43: Cilia- and flagella-associated protein 43	3.81	2.70154
Sjc_0000087	Similar to BACE: Beta-secretase	3.77	3.21882
Sjc_0002809	Similar to Dynein beta chain%2C ciliary	3.61333	3.14998
Sjc_0002449	Similar to DNAH3: Dynein heavy chain 3%2C axonemal	2.97	3.48008
Sjc_0004135	Similar to AK9: Adenylate kinase 9	2.85333	3.0533
Sjc_0003188	Similar to Ir25a: Ionotropic receptor 25a	2.7	2.4355
Sjc_0004925	coiled-coil domain-containing 87-like	2.56667	2.37477
Sjc_0007008	Similar to Dnah2: Dynein heavy chain 2%2C axonemal	2.45333	2.39827
Sjc_0000078	Similar to Cfap65: Cilia- and flagella-associated protein 65	2.28333	2.58288
Sjc_0002767	hypothetical protein	2.27333	2.99284

## Sheet: SEG in Mir
GeneID	Gene annotation	Transcript abudance at this stage (TPM)
Sjc_0002751	Similar to CG32500: NFU1 iron-sulfur cluster scaffold homolog%2C mitochondrial (Drosophila melanogaster OX%3D7227)	57.6967
Sjc_0008598	hypothetical protein	2.81667
Sjc_0009564	SJCHGC09538 protein	2.70333
Sjc_0000062	egg protein CP391S	2.49
Sjc_0000218	unnamed protein product	2.11333
Sjc_0000650	Protein of unknown function	2.05667
Sjc_0003879	Similar to sax-3: Protein sax-3 (Caenorhabditis elegans OX%3D6239)	2.01333
Sjc_0004493	Similar to 5-hydroxytryptamine receptor (Lymnaea stagnalis OX%3D6523)	1.85333
Sjc_0007296	Protein of unknown function	1.81333
Sjc_0000367	Similar to bli-4: Endoprotease bli-4 (Caenorhabditis elegans OX%3D6239)	1.62333
Sjc_0000524	Similar to YTHDC2: 3'-5' RNA helicase YTHDC2 (Homo sapiens OX%3D9606)	1.6
Sjc_0009511	Microtubule-associated protein	1.51333
Sjc_0006900	Similar to CASK: Peripheral plasma membrane protein CASK (Homo sapiens OX%3D9606)	1.39667
Sjc_0003542	Similar to Msh5: MutS protein homolog 5 (Mus musculus OX%3D10090)	1.37667
Sjc_0007873	hypothetical protein	1.31333
Sjc_0000058	egg protein CP391S	1.25333
Sjc_0005655	SJCHGC09538 protein	1.21667
Sjc_0003477	Protein of unknown function	1.02667
Sjc_0009565	SJCHGC09538 protein	1.00667
Sjc_0006099	proprotein convertase subtilisin/kexin type 2	0.963333
Sjc_0002741	putative cell adhesion molecule	0.703333

## Sheet: EEG in Mir
GeneID	Gene annotation	Transcript abudance at this stage (TPM)	log2FoldChange
Sjc_0004619	SJCHGC03220 protein	22.9133	3.09797
Sjc_0009092	partitioning defective 3	2.37333	2.5368

## Sheet: SEG in Spo
GeneID	Gene annotation	Transcript abudance at this stage (TPM)
Sjc_0006363	Similar to Lmln: Leishmanolysin-like peptidase (Mus musculus OX%3D10090)	693.727
Sjc_0005079	hypothetical protein	305.56
Sjc_0008947	SjCE2b (Schistosoma mansoni OX%3D6183)	296.913
Sjc_0003756	hypothetical protein	288.903
Sjc_0006650	Similar to LMLN: Leishmanolysin-like peptidase (Homo sapiens OX%3D9606)	264.363
Sjc_0008413	Venom allergen 5	256.23
Sjc_0001532	SJCHGC03548 protein	221.783
Sjc_0008852	Protein of unknown function	186.11
Sjc_0006649	Similar to GA17800: Leishmanolysin-like peptidase (Drosophila pseudoobscura pseudoobscura OX%3D46245)	164.627
Sjc_0008414	Similar to Venom allergen 5 (Vespa mandarinia OX%3D7446)	139.497
Sjc_0004912	Protein of unknown function	122.417
Sjc_0006646	Similar to GA17800: Leishmanolysin-like peptidase (Drosophila pseudoobscura pseudoobscura OX%3D46245)	110.36
Sjc_0002446	Protein of unknown function	103.463
Sjc_0006648	Similar to CBG03556: Leishmanolysin-like peptidase (Caenorhabditis briggsae OX%3D6238)	90.0967
Sjc_0000738	Interspersed repeat-like protein	77.4933
Sjc_0008125	Protein of unknown function	69.7633
Sjc_0000841	unnamed protein product	59.2133
Sjc_0005487	hypothetical protein	45.6667
Sjc_0000249	Tegument antigen	41.0567
Sjc_0005488	Protein of unknown function	31.6233
Sjc_0008995	Protein of unknown function	26.54
Sjc_0006647	Leishmanolysin-like peptidase	26.3367
Sjc_0005070	Protein of unknown function	25.1467
Sjc_0001941	Similar to CPNE9: Copine-9 (Homo sapiens OX%3D9606)	24.02
Sjc_0006120	Leishmanolysin-like peptidase	23.7433
Sjc_0009580	Protein of unknown function	22.33
Sjc_0007519	Protein of unknown function	21.53
Sjc_0000686	Protein of unknown function	21.4767
Sjc_0000502	hypothetical protein	21.0967
Sjc_0001424	dbl related	21.08
Sjc_0002445	Protein of unknown function	21.0033
Sjc_0000238	Protein of unknown function	20.6867
Sjc_0006068	Similar to HAND2: Heart- and neural crest derivatives-expressed protein 2 (Gallus gallus OX%3D9031)	20.2033
Sjc_0008001	SJCHGC04468 protein	18.9533
Sjc_0009531	SJCHGC01890 protein	17.64
Sjc_0004062	Similar to SLC47A1: Multidrug and toxin extrusion protein 1 (Oryctolagus cuniculus OX%3D9986)	16.5233
Sjc_0000080	Plexin domain-containing protein	15.0667
Sjc_0009662	Similar to GenBank Accession Number AE003423 CG3073 gene product in Drosophila melanogaster	14.7367
Sjc_0009271	Similar to cnd-1: Neurogenic differentiation factor 1 (Caenorhabditis elegans OX%3D6239)	14.5367
Sjc_0001005	IPR001092 Basic helix-loop-helix dimerisation region bHLH,domain-containing protein	13.78
Sjc_0005304	Protein of unknown function	13.51
Sjc_0008573	hypothetical protein Smp_174500	13.36
Sjc_0000351	Similar to heyl: Hairy/enhancer-of-split related with YRPW motif-like protein (Danio rerio OX%3D7955)	13.0667
Sjc_0007748	Protein of unknown function	12.6033
Sjc_0007088	SJCHGC09165 protein	11.9933
Sjc_0005836	protein aurora borealis	11.9133
Sjc_0007885	Similar to INHBA: Inhibin beta A chain (Bos taurus OX%3D9913)	11.64
Sjc_0009344	SJCHGC08318 protein	11.5767
Sjc_0008575	hypothetical protein	11.29
Sjc_0000287	CD59-like protein	10.9067
Sjc_0007096	SJCHGC07509 protein	10.1533
Sjc_0007099	Similar to gcm: Transcription factor glial cells missing (Drosophila melanogaster OX%3D7227)	10.1533
Sjc_0004281	Similar to HMCN2: Hemicentin-2 (Homo sapiens OX%3D9606)	9.99333
Sjc_0007097	Similar to ECE1: Endothelin-converting enzyme 1 (Bos taurus OX%3D9913)	9.52667
Sjc_0008027	Peptidase inhibitor 16	9.46333
Sjc_0002839	Similar to Prdm9: Histone-lysine N-methyltransferase PRDM9 (Mus musculus OX%3D10090)	9.30667
Sjc_0000031	plexin domain-containing protein 2	9.3
Sjc_0003534	hypothetical protein	8.84667
Sjc_0009532	hypothetical protein	8.80667
Sjc_0006901	Protein of unknown function	8.73
Sjc_0002207	Similar to TCTE1: Dynein regulatory complex subunit 5 (Macaca fascicularis OX%3D9541)	8.28
Sjc_0009695	protein prenyltransferase alpha subunit repeat containing protein 1	8.14333
Sjc_0009462	Protein of unknown function	8.05
Sjc_0008173	Similar to crispld2: Cysteine-rich secretory protein LCCL domain-containing 2 (Xenopus tropicalis OX%3D8364)	7.94667
Sjc_0004333	hypothetical protein	7.60667
Sjc_0003253	PH domain	7.57667
Sjc_0000052	High affinity cGMP-specific 3',5'-cyclic phosphodiesterase 9A	7.34
Sjc_0000075	egg protein CP391S	7.26333
Sjc_0008113	Similar to Venom allergen 5 (Vespula pensylvanica OX%3D30213)	7.18333
Sjc_0005077	hypothetical protein	7.17667
Sjc_0009003	Protein of unknown function	7.06667
Sjc_0008399	SJCHGC05998 protein	6.92333
Sjc_0008767	Similar to lge-1: Glycosyltransferase-like protein LARGE (Caenorhabditis elegans OX%3D6239)	6.84333
Sjc_0008492	hypothetical protein	6.76
Sjc_0003417	ERI1 exoribonuclease 3	6.61
Sjc_0006632	Similar to IGSF10: Immunoglobulin superfamily member 10 (Homo sapiens OX%3D9606)	6.55667
Sjc_0006219	Similar to Invadolysin: Leishmanolysin-like peptidase (Drosophila melanogaster OX%3D7227)	6.29667
Sjc_0004728	Similar to RTTN: Rotatin (Homo sapiens OX%3D9606)	6.25667
Sjc_0004695	hypothetical protein	6.20667
Sjc_0005654	protein prenyltransferase alpha subunit repeat containing protein 1	6.08333
Sjc_0000312	Neogenin -like protein	5.90667
Sjc_0000645	39S ribosomal protein L41 mitochondrial	5.83333
Sjc_0000842	Protein of unknown function	5.78
Sjc_0004911	hypothetical protein	5.75667
Sjc_0003989	hypothetical protein	5.73333
Sjc_0001893	Similar to dpn: Protein deadpan (Drosophila melanogaster OX%3D7227)	5.65667
Sjc_0000215	unnamed protein product	5.50333
Sjc_0008433	hypothetical protein	5.41333
Sjc_0004305	Similar to MAN2B1: Lysosomal alpha-mannosidase (Bos taurus OX%3D9913)	5.36
Sjc_0000240	Protein of unknown function	5.34667
Sjc_0004680	Similar to TJP3: Tight junction protein ZO-3 (Canis lupus familiaris OX%3D9615)	5.34667
Sjc_0008629	hypothetical protein	5.23
Sjc_0002013	hypothetical protein	4.89333
Sjc_0008533	hypothetical protein	4.87667
Sjc_0003759	Potassium channel subfamily K member 6	4.85
Sjc_0001834	Similar to AOC1: Amiloride-sensitive amine oxidase [copper-containing] (Homo sapiens OX%3D9606)	4.63
Sjc_0005652	SJCHGC02250 protein	4.62667
Sjc_0005307	SJCHGC08568 protein	4.58333
Sjc_0003366	Similar to dmrt3: Doublesex- and mab-3-related transcription factor 3 (Takifugu rubripes OX%3D31033)	4.56667
Sjc_0007904	Protein of unknown function	4.56667
Sjc_0009395	Protein of unknown function	4.56
Sjc_0008997	Protein of unknown function	4.42
Sjc_0002569	Similar to esrp1: Epithelial splicing regulatory protein 1 (Xenopus tropicalis OX%3D8364)	4.34
Sjc_0001143	Similar to rx2: Retinal homeobox protein Rx2 (Oryzias latipes OX%3D8090)	4.31
Sjc_0009733	SJCHGC04468 protein	4.3
Sjc_0004763	hypothetical protein	4.26
Sjc_0009508	hypothetical protein	4.24333
Sjc_0004817	Similar to disco: Protein disconnected (Drosophila melanogaster OX%3D7227)	4.17333
Sjc_0002808	Similar to croc: Fork head domain-containing protein crocodile (Drosophila melanogaster OX%3D7227)	4.15333
Sjc_0000737	hypothetical protein	4.12
Sjc_0000792	Similar to Pdfr: PDF receptor (Drosophila melanogaster OX%3D7227)	4.12
Sjc_0002854	hypothetical protein	4.09333
Sjc_0004081	Similar to B3GALT5: Beta-1%2C3-galactosyltransferase 5 (Fragment) (Pan paniscus OX%3D9597)	4.02333
Sjc_0006778	Similar to tpst-1: Protein-tyrosine sulfotransferase A (Caenorhabditis elegans OX%3D6239)	4.02333
Sjc_0006481	Similar to NAB1: NGFI-A-binding protein 1 (Homo sapiens OX%3D9606)	3.98667
Sjc_0009253	Protein of unknown function	3.90667
Sjc_0006512	Similar to Trpm7: Transient receptor potential cation channel subfamily M member 7 (Rattus norvegicus OX%3D10116)	3.89
Sjc_0000594	unnamed protein product	3.88667
Sjc_0000073	Plexin domain-containing protein	3.88
Sjc_0004422	Similar to SLC6A8: Sodium- and chloride-dependent creatine transporter 1 (Homo sapiens OX%3D9606)	3.85
Sjc_0000032	hypothetical protein	3.8
Sjc_0000501	hypothetical protein	3.66333
Sjc_0009748	hypothetical protein	3.62333
Sjc_0002968	Similar to Ovol2: Transcription factor Ovo-like 2 (Mus musculus OX%3D10090)	3.51667
Sjc_0005479	Similar to sli: Protein slit (Drosophila melanogaster OX%3D7227)	3.51333
Sjc_0004086	asteroid 1	3.37
Sjc_0001749	putative ran	3.34
Sjc_0006265	hypothetical protein Smp_050760	3.31667
Sjc_0005451	hypothetical protein	3.25667
Sjc_0007910	18S rRNA (guanine1575-N7)-methyltransferase	3.25333
Sjc_0000291	tetratricopeptide repeat 23-like	3.24
Sjc_0007666	Similar to tpst-1: Protein-tyrosine sulfotransferase A (Caenorhabditis elegans OX%3D6239)	3.23333
Sjc_0000204	SJCHGC04739 protein	3.23
Sjc_0000313	Netrin receptor DCC	3.22667
Sjc_0006742	Similar to CETN3: Centrin-3 (Homo sapiens OX%3D9606)	3.19667
Sjc_0002635	Similar to PXDNL: Peroxidasin-like protein (Homo sapiens OX%3D9606)	3.19333
Sjc_0000987	dynein light chain LC8-type	3.18333
Sjc_0009446	nuclear receptor	3.17333
Sjc_0000830	hypothetical protein	3.16333
Sjc_0007383	Peptidase S1 S6 chymotrypsin Hap active site	3.16
Sjc_0007665	Similar to tpst-1: Protein-tyrosine sulfotransferase A (Caenorhabditis elegans OX%3D6239)	3.13333
Sjc_0009060	APOBEC1 complementation factor	3.11333
Sjc_0005889	Similar to Abcb1a: Multidrug resistance protein 1A (Mus musculus OX%3D10090)	3.10333
Sjc_0002855	Protein of unknown function	3.09
Sjc_0001586	CCD75287.1 FAM44A	3.06667
Sjc_0007916	Similar to TBR1: T-box brain protein 1 (Homo sapiens OX%3D9606)	3.01333
Sjc_0006623	Similar to Trpgamma: Transient receptor potential-gamma protein (Drosophila melanogaster OX%3D7227)	2.99333
Sjc_0001478	Similar to KLF15: Krueppel-like factor 15 (Homo sapiens OX%3D9606)	2.94667
Sjc_0006190	hypothetical protein	2.92333
Sjc_0005605	Similar to METTL5: Methyltransferase-like protein 5 (Homo sapiens OX%3D9606)	2.87
Sjc_0005731	Suppressor of lurcher protein	2.85667
Sjc_0009288	Protein of unknown function	2.84333
Sjc_0005839	Similar to MSH4: MutS protein homolog 4 (Homo sapiens OX%3D9606)	2.82333
Sjc_0005915	hypothetical protein	2.80333
Sjc_0006197	Similar to KIF17: Kinesin-like protein KIF17 (Homo sapiens OX%3D9606)	2.78667
Sjc_0000118	Plexin domain-containing protein	2.77667
Sjc_0000236	Protein of unknown function	2.69
Sjc_0006192	hypothetical protein	2.67333
Sjc_0002471	Similar to FucTC: Alpha-(1%2C3)-fucosyltransferase C (Drosophila melanogaster OX%3D7227)	2.63667
Sjc_0007561	SJCHGC08378 protein	2.57333
Sjc_0009658	SJCHGC07327 protein	2.54333
Sjc_0006745	Protein of unknown function	2.49333
Sjc_0008885	Collagen alpha-1(XIV) chain	2.42
Sjc_0009258	serine arginine repetitive matrix 1	2.36
Sjc_0006420	putative tetraspanin	2.31667
Sjc_0002211	Similar to TCTE1: Dynein regulatory complex subunit 5 (Homo sapiens OX%3D9606)	2.3
Sjc_0005472	Similar to Rasef: Ras and EF-hand domain-containing protein homolog (Mus musculus OX%3D10090)	2.29667
Sjc_0001910	Similar to nrf-6: Nose resistant to fluoxetine protein 6 (Caenorhabditis elegans OX%3D6239)	2.24667
Sjc_0001188	Similar to insm1: Insulinoma-associated protein 1 (Xenopus tropicalis OX%3D8364)	2.24333
Sjc_0003098	Similar to foxd3-b: Forkhead box protein D3-B (Xenopus laevis OX%3D8355)	2.19
Sjc_0002653	Similar to Lin54: Protein lin-54 homolog (Mus musculus OX%3D10090)	2.18
Sjc_0002077	Similar to bark: Protein bark beetle (Drosophila melanogaster OX%3D7227)	2.16333
Sjc_0007611	PDZ DHR GLGF domain-containing-like protein	2.15667
Sjc_0001857	SJCHGC09622 protein	2.14667
Sjc_0004774	Meiosis-specific with OB domain-containing protein	2.14667
Sjc_0006390	smad1, 5, 8, and, putative	2.11667
Sjc_0001332	Similar to STARD9: StAR-related lipid transfer protein 9 (Homo sapiens OX%3D9606)	2.11
Sjc_0006260	Protein of unknown function	2.10667
Sjc_0008004	SJCHGC04468 protein	2.10667
Sjc_0004291	Similar to VSX2: Visual system homeobox 2 (Gallus gallus OX%3D9031)	2.06333
Sjc_0003649	Similar to BCL11A: B-cell lymphoma/leukemia 11A (Homo sapiens OX%3D9606)	2.05
Sjc_0005024	Similar to Wdr19: WD repeat-containing protein 19 (Mus musculus OX%3D10090)	2.05
Sjc_0006187	hypothetical protein	2.03667
Sjc_0007657	Protein of unknown function	2.03
Sjc_0004942	Similar to ACPP: Prostatic acid phosphatase (Bos taurus OX%3D9913)	2.02
Sjc_0009447	Similar to nr2f1b: Nuclear receptor subfamily 2 group F member 1-B (Danio rerio OX%3D7955)	2
Sjc_0005729	Dysferlin	1.98667
Sjc_0001604	Similar to onecut: Homeobox protein onecut (Drosophila melanogaster OX%3D7227)	1.96
Sjc_0008993	hypothetical protein	1.94333
Sjc_0006399	Similar to GA17800: Leishmanolysin-like peptidase (Drosophila pseudoobscura pseudoobscura OX%3D46245)	1.91667
Sjc_0005235	Similar to HOXD3: Homeobox protein Hox-D3 (Homo sapiens OX%3D9606)	1.9
Sjc_0009205	Irregular chiasm C-roughest protein	1.89333
Sjc_0004145	hypothetical protein	1.88
Sjc_0002539	hypothetical protein Smp_153120	1.87333
Sjc_0005256	Similar to SMOX-5: Homeobox protein SMOX-5 (Schistosoma mansoni OX%3D6183)	1.87333
Sjc_0006186	hypothetical protein	1.86667
Sjc_0000076	putative plexin domain containing 2 precursor	1.81667
Sjc_0008878	Protein of unknown function	1.78333
Sjc_0007419	Similar to MECOM: Histone-lysine N-methyltransferase MECOM (Homo sapiens OX%3D9606)	1.72333
Sjc_0009655	SJCHGC09017 protein	1.69667
Sjc_0007610	PDZ DHR GLGF domain-containing-like protein	1.68
Sjc_0005303	Protein of unknown function	1.62667
Sjc_0006299	Protein of unknown function	1.61667
Sjc_0009705	Epidermal growth factor receptor	1.61667
Sjc_0007225	Ras GTPase-activating protein gap-2	1.59667
Sjc_0008424	Similar to CTNNBL1: Beta-catenin-like protein 1 (Bos taurus OX%3D9913)	1.59667
Sjc_0007702	protein prenyltransferase alpha subunit repeat containing protein 1	1.59333
Sjc_0002669	SJCHGC03897 protein	1.58667
Sjc_0005308	Cadherin-like and PC-esterase domain-containing protein	1.57333
Sjc_0006555	cyclin B1 interacting protein 1	1.51667
Sjc_0007816	Rho GTPase-activating protein	1.48667
Sjc_0004757	Protocadherin gamma-A3	1.47
Sjc_0005087	Protein of unknown function	1.46667
Sjc_0000108	putative nuclear hormone receptor	1.41667
Sjc_0001774	Protein of unknown function	1.39333
Sjc_0004536	Transient receptor potential cation channel subfamily M member 3	1.38
Sjc_0000437	Similar to Cat-1: Cathepsin L-like proteinase (Fasciola hepatica OX%3D6192)	1.37667
Sjc_0009575	unnamed protein product, partial	1.35333
Sjc_0007809	Similar to B-H1: Homeobox protein B-H1 (Drosophila melanogaster OX%3D7227)	1.34
Sjc_0001204	Similar to bbs9: Protein PTHB1 (Xenopus laevis OX%3D8355)	1.33
Sjc_0007900	hypothetical protein	1.33
Sjc_0000398	SJCHGC08526 protein	1.32333
Sjc_0008047	Similar to Klf11: Krueppel-like factor 11 (Mus musculus OX%3D10090)	1.3
Sjc_0006889	Inactive serine/threonine-protein kinase TEX14	1.28333
Sjc_0008432	Protein of unknown function	1.28333
Sjc_0008425	Protein of unknown function	1.28333
Sjc_0005767	hypothetical protein	1.26667
Sjc_0008276	Similar to NPR1: Atrial natriuretic peptide receptor 1 (Homo sapiens OX%3D9606)	1.18333
Sjc_0002205	Similar to ANKMY1: Ankyrin repeat and MYND domain-containing protein 1 (Homo sapiens OX%3D9606)	1.17
Sjc_0000264	Protein of unknown function	1.14
Sjc_0005146	Similar to REPTOR: Protein CREBRF homolog (Drosophila melanogaster OX%3D7227)	1.11667
Sjc_0009534	SJCHGC01890 protein	1.11667
Sjc_0005650	Surface protein PspC	1.11333
Sjc_0003812	Protein of unknown function	1.08667
Sjc_0006768	Similar to stan: Protocadherin-like wing polarity protein stan (Drosophila melanogaster OX%3D7227)	1.08667
Sjc_0002057	Beta-arrestin arr-1	1.06667
Sjc_0000641	E3 ubiquitin-protein ligase DCST1	1.06333
Sjc_0001846	Similar to Slc33a1: Acetyl-coenzyme A transporter 1 (Mus musculus OX%3D10090)	1.06333
Sjc_0009309	Brain-specific homeobox protein	1.06
Sjc_0007887	Similar to Lar: Tyrosine-protein phosphatase Lar (Drosophila melanogaster OX%3D7227)	1.04
Sjc_0009020	Protein of unknown function	1.02667
Sjc_0004147	Similar to ITSN2: Intersectin-2 (Homo sapiens OX%3D9606)	1.02333
Sjc_0002655	Tolloid-like protein	1.01667
Sjc_0007649	Protein of unknown function	1.01
Sjc_0009086	Similar to rasgrf2: Ras-specific guanine nucleotide-releasing factor 2 (Danio rerio OX%3D7955)	0.946667
Sjc_0006062	Similar to hoxa2b: Homeobox protein Hox-A2b (Takifugu rubripes OX%3D31033)	0.883333
Sjc_0009767	SJCHGC06793 protein	0.88
Sjc_0003875	Similar to Nep4: Neprilysin-4 (Drosophila melanogaster OX%3D7227)	0.853333
Sjc_0000072	Protein of unknown function	0.833333
Sjc_0000537	Muscle-specific homeobox protein	0.833333
Sjc_0003073	Protein sevenless	0.72

## Sheet: EEG in Spo
GeneID	Gene annotation	Transcript abudance(TPM)	log2FoldChange
Sjc_0008273	Similar to SJCHGC09800: Uncharacterized protein SJCHGC09800 (Schistosoma japonicum OX%3D6182)	3824.05	7.72445
Sjc_0004914	Protein of unknown function	2268.82	9.09599
Sjc_0001811	SJCHGC09710 protein	1711.74	2.93556
Sjc_0005078	hypothetical protein	1205.22	9.09587
Sjc_0000328	hypothetical protein	991.667	7.27104
Sjc_0005074	hypothetical protein	910.37	9.65393
Sjc_0001531	SJCHGC03548 protein	890.847	5.02363
Sjc_0004913	Protein of unknown function	853.153	5.55313
Sjc_0009380	unnamed protein product	754.977	7.30136
Sjc_0009381	hypothetical protein	749.9	8.01311
Sjc_0004970	hypothetical protein	748.14	7.6263
Sjc_0009759	NADH dehydrogenase subunit 5 (mitochondrion)	692.193	3.56262
Sjc_0006651	Similar to CBG03556: Leishmanolysin-like peptidase (Caenorhabditis briggsae OX%3D6238)	618.66	8.55188
Sjc_0000233	Protein of unknown function	591.23	8.29578
Sjc_0005041	hypothetical protein	550.013	6.50618
Sjc_0004971	hypothetical protein	546.287	8.6293
Sjc_0005890	Similar to RPIA: Ribose-5-phosphate isomerase (Fragment) (Bos taurus OX%3D9913)	524.927	2.32452
Sjc_0001784	hypothetical protein	486.963	7.24333
Sjc_0000638	Similar to SUOX: Sulfite oxidase%2C mitochondrial (Homo sapiens OX%3D9606)	456.593	2.66858
Sjc_0005264	Similar to ccnb2: G2/mitotic-specific cyclin-B2 (Xenopus laevis OX%3D8355)	419.337	3.26874
Sjc_0001840	Similar to mel-32: Serine hydroxymethyltransferase (Caenorhabditis briggsae OX%3D6238)	369.897	2.35296
Sjc_0002360	geminin-like	363.203	2.56165
Sjc_0004170	Similar to Mgst1: Microsomal glutathione S-transferase 1 (Mus musculus OX%3D10090)	342.18	3.47828
Sjc_0005073	Aggrecan core	320.823	6.77892
Sjc_0008209	Similar to Tk2: Thymidine kinase 2%2C mitochondrial (Mus musculus OX%3D10090)	300.99	3.12556
Sjc_0008411	GLIPR1-like protein 1	291.22	7.12817
Sjc_0002123	Similar to Alpha-1-antitrypsin-like protein CM55-MM (Tamias sibiricus OX%3D64680)	275.927	7.92552
Sjc_0001067	Similar to Plk1: Serine/threonine-protein kinase PLK1 (Rattus norvegicus OX%3D10116)	255.183	2.93143
Sjc_0000705	Similar to MCM2: DNA replication licensing factor MCM2 (Homo sapiens OX%3D9606)	249.797	2.73736
Sjc_0006244	Similar to BARD1: BRCA1-associated RING domain protein 1 (Homo sapiens OX%3D9606)	239.31	4.10075
Sjc_0005331	hypothetical protein	237.27	3.5772
Sjc_0001270	SJCHGC08062 protein	231.267	2.40459
Sjc_0006166	Collagen alpha-2(I) chain	230.97	3.9168
Sjc_0005075	hypothetical protein	221.187	5.43033
Sjc_0003845	Similar to mcm7-a: DNA replication licensing factor mcm7-A (Xenopus laevis OX%3D8355)	220.627	2.46327
Sjc_0006493	Similar to Col5a2: Collagen alpha-2(V) chain (Mus musculus OX%3D10090)	219.52	3.70516
Sjc_0005262	hypothetical protein	215.027	2.97472
Sjc_0000517	Kinetochore Ndc80 complex subunit Spc25	213.52	2.41571
Sjc_0001264	hypothetical protein	212.2	2.33921
Sjc_0002338	Secreted Protein Acidic and Cysteine Rich	206.463	2.53033
Sjc_0007667	Similar to calub: Calumenin-B (Salmo salar OX%3D8030)	203.5	2.53912
Sjc_0006908	Similar to Guanine nucleotide-binding protein G(i) subunit alpha (Lymnaea stagnalis OX%3D6523)	199.987	2.40122
Sjc_0005376	Fibrillar collagen chain FAp1 alpha	199.43	4.05946
Sjc_0007514	Similar to SLC5A3: Sodium/myo-inositol cotransporter (Homo sapiens OX%3D9606)	197.783	2.78642
Sjc_0001912	Similar to Cdc20: Cell division cycle protein 20 homolog (Rattus norvegicus OX%3D10116)	191.867	2.51559
Sjc_0002856	Similar to asnsd1: Asparagine synthetase domain-containing protein 1 (Danio rerio OX%3D7955)	191.863	2.63188
Sjc_0000234	Protein of unknown function	186.187	7.33319
Sjc_0007353	Similar to mcm5: DNA replication licensing factor mcm5 (Xenopus tropicalis OX%3D8364)	182.497	2.39535
Sjc_0003071	Similar to Scarb2: Lysosome membrane protein 2 (Rattus norvegicus OX%3D10116)	179.967	4.36401
Sjc_0006744	hypothetical protein	177.893	2.91676
Sjc_0002798	Similar to psf3: DNA replication complex GINS protein psf3 (Neosartorya fumigata (strain ATCC MYA-4609 / Af293 / CBS 101355 / FGSC A1100) OX%3D330879)	174.687	2.83009
Sjc_0002379	Similar to MAD2L1: Mitotic spindle assembly checkpoint protein MAD2A (Homo sapiens OX%3D9606)	173.857	2.43891
Sjc_0009701	protein prenyltransferase alpha subunit repeat containing protein 1	163.337	4.10436
Sjc_0007026	Similar to Cdc25b: M-phase inducer phosphatase 2 (Mus musculus OX%3D10090)	160.52	2.3499
Sjc_0000924	Similar to Ago2: Protein argonaute-2 (Mus musculus OX%3D10090)	159.233	2.53115
Sjc_0007093	SJCHGC07509 protein	158.857	2.58332
Sjc_0004972	hypothetical protein	156.617	7.83027
Sjc_0001783	hypothetical protein	152.393	6.40219
Sjc_0006275	Similar to KIF11: Kinesin-like protein KIF11 (Homo sapiens OX%3D9606)	148.457	2.64608
Sjc_0007350	disks large associated 5	147.68	3.02463
Sjc_0007403	Similar to KIF23: Kinesin-like protein KIF23 (Homo sapiens OX%3D9606)	147.173	2.95455
Sjc_0008281	Similar to cdk1: Cyclin-dependent kinase 1 (Carassius auratus OX%3D7957)	144.72	2.56987
Sjc_0008058	Similar to mcm4-a: DNA replication licensing factor mcm4-A (Xenopus laevis OX%3D8355)	138.94	2.51698
Sjc_0004514	Similar to rnf121: RING finger protein 121 (Xenopus laevis OX%3D8355)	137.933	2.44375
Sjc_0000499	SJCHGC05668 protein	133.283	2.7706
Sjc_0007298	Similar to RAD9A: Cell cycle checkpoint control protein RAD9A (Homo sapiens OX%3D9606)	132.127	2.61655
Sjc_0006061	Similar to melk: Maternal embryonic leucine zipper kinase (Xenopus laevis OX%3D8355)	131.307	3.49461
Sjc_0006156	SJCHGC03205 protein	130.93	2.71996
Sjc_0009137	nucleolar and spindle-associated 1	128.577	3.01737
Sjc_0008006	Similar to PRC1: Protein regulator of cytokinesis 1 (Homo sapiens OX%3D9606)	127.5	2.44431
Sjc_0006761	Similar to DIP13: 13 kDa deflagellation-inducible protein (Chlamydomonas reinhardtii OX%3D3055)	126.243	2.34241
Sjc_0003099	hypothetical protein	124.757	2.56171
Sjc_0007229	SJCHGC01519 protein	121.023	2.43238
Sjc_0002969	Similar to Prim2: DNA primase large subunit (Mus musculus OX%3D10090)	120.587	3.02979
Sjc_0001382	Similar to NT5DC3: 5'-nucleotidase domain-containing protein 3 (Homo sapiens OX%3D9606)	120.26	2.60344
Sjc_0008412	venom allergen-like (VAL) 4 protein	119.247	6.42836
Sjc_0007086	SJCHGC02674 protein	116.693	2.63298
Sjc_0008126	UPF0506 protein	114.643	6.13683
Sjc_0003418	Similar to Mpp4: MAGUK p55 subfamily member 4 (Rattus norvegicus OX%3D10116)	112.663	2.40772
Sjc_0007168	Uveal autoantigen with coiled-coil domains and ankyrin repeats protein, putative	112.273	3.52452
Sjc_0004887	Similar to Orc5: Origin recognition complex subunit 5 (Mus musculus OX%3D10090)	108.92	3.01204
Sjc_0001213	Similar to RANBP1: Ran-specific GTPase-activating protein (Homo sapiens OX%3D9606)	106.443	2.60722
Sjc_0001035	Similar to Slbp: Histone RNA hairpin-binding protein (Drosophila melanogaster OX%3D7227)	104.797	2.95898
Sjc_0001077	SJCHGC04616 protein	103.677	2.83696
Sjc_0005761	achaete scute transcription factor	102.603	2.351
Sjc_0000548	Similar to POLA2: DNA polymerase alpha subunit B (Homo sapiens OX%3D9606)	101.44	3.3965
Sjc_0007067	N acetyltransferase ESCO1	95.1767	2.59175
Sjc_0002566	Similar to Msh2: DNA mismatch repair protein Msh2 (Mus musculus OX%3D10090)	94.3867	2.92842
Sjc_0000479	Epa2p-like protein	92.7333	2.5879
Sjc_0001859	zinc finger-containing-like protein	91.7567	4.4604
Sjc_0007500	Similar to MCMBP: Mini-chromosome maintenance complex-binding protein (Gallus gallus OX%3D9031)	91.1367	2.403
Sjc_0008069	Mitochondrial fission regulator 2	90.5133	2.48651
Sjc_0001068	Similar to Kdm7a: Lysine-specific demethylase 7A (Mus musculus OX%3D10090)	88.71	2.33085
Sjc_0002088	Similar to POLE2: DNA polymerase epsilon subunit 2 (Bos taurus OX%3D9913)	88.5867	2.74388
Sjc_0007708	Similar to Cdc45: Cell division control protein 45 homolog (Mus musculus OX%3D10090)	86.5933	2.84467
Sjc_0002571	Similar to chaf1a-a: Chromatin assembly factor 1 subunit A-A (Xenopus laevis OX%3D8355)	86.2667	2.37225
Sjc_0005177	Similar to fam161a: Protein FAM161A (Xenopus laevis OX%3D8355)	85.4033	3.09125
Sjc_0003892	asteroid 1	84.99	3.23289
Sjc_0005490	hypothetical protein	84.4133	5.55011
Sjc_0000378	Similar to RARG: Retinoic acid receptor gamma (Notophthalmus viridescens OX%3D8316)	84.0233	2.72015
Sjc_0002134	Similar to Col5a1: Collagen alpha-1(V) chain (Rattus norvegicus OX%3D10116)	83.8867	6.44515
Sjc_0000808	Similar to Col5a1: Collagen alpha-1(V) chain (Rattus norvegicus OX%3D10116)	83.83	2.36067
Sjc_0005329	protein regulator of cytokinesis 1	82.7933	3.03025
Sjc_0007234	Protein SFI1	81.5267	3.19677
Sjc_0007908	Origin recognition complex subunit 3	80.8	3.09289
Sjc_0000577	Similar to CIT: Citron Rho-interacting kinase (Homo sapiens OX%3D9606)	80.7567	3.32077
Sjc_0002426	Similar to Racgap1: Rac GTPase-activating protein 1 (Mus musculus OX%3D10090)	80.27	2.42255
Sjc_0007664	Similar to Ppn: Papilin (Drosophila melanogaster OX%3D7227)	78.78	6.07588
Sjc_0001194	p53 transcription factor DNA binding	77.7533	3.42956
Sjc_0002434	Similar to DCHS2: Protocadherin-23 (Homo sapiens OX%3D9606)	77.57	2.32618
Sjc_0009393	Similar to thrb: Thyroid hormone receptor beta (Danio rerio OX%3D7955)	77.41	3.35842
Sjc_0005405	Similar to PRCP: Lysosomal Pro-X carboxypeptidase (Homo sapiens OX%3D9606)	76.61	2.49238
Sjc_0005862	Antigen KI-67	76.3233	3.52329
Sjc_0003687	Similar to aurkb-b: Aurora kinase B-B (Xenopus laevis OX%3D8355)	74.47	2.40696
Sjc_0006595	Similar to ORC2: Origin recognition complex subunit 2 (Homo sapiens OX%3D9606)	74.1133	2.82066
Sjc_0005375	Collagen alpha chain	73.38	3.36983
Sjc_0007479	Similar to PROX1: Prospero homeobox protein 1 (Gallus gallus OX%3D9031)	73.29	5.08802
Sjc_0001374	Similar to HPF1: Histone PARylation factor 1 (Homo sapiens OX%3D9606)	71.9833	2.74356
Sjc_0007095	SJCHGC02717 protein	71.7967	3.11244
Sjc_0004110	Similar to ccnd1: G1/S-specific cyclin-D1 (Danio rerio OX%3D7955)	71.28	2.59126
Sjc_0001227	Similar to ptdss2: Phosphatidylserine synthase 2 (Danio rerio OX%3D7955)	70.19	2.79363
Sjc_0001935	Similar to REX4: RNA exonuclease 4 (Cryptococcus neoformans var. neoformans serotype D (strain B-3501A) OX%3D283643)	69.8633	2.53389
Sjc_0005374	Collagen alpha chain	68.89	4.26734
Sjc_0000255	retinal guanylyl cyclase 2	68.85	2.37558
Sjc_0009725	Similar to COI: Cytochrome c oxidase subunit 1 (Lumbricus terrestris OX%3D6398)	66.91	3.40541
Sjc_0008748	Similar to Parp1: Poly [ADP-ribose] polymerase 1 (Rattus norvegicus OX%3D10116)	66.63	2.51647
Sjc_0006909	Similar to Fanci: Fanconi anemia group I protein homolog (Mus musculus OX%3D10090)	65.42	3.41316
Sjc_0006155	SJCHGC08798 protein	63.3433	4.90787
Sjc_0000988	Similar to Probable dynein light chain (Schistosoma mansoni OX%3D6183)	62.6167	5.12677
Sjc_0003494	Adenosylhomocysteinase A	61.6233	2.39005
Sjc_0006047	Similar to SNED1: Sushi%2C nidogen and EGF-like domain-containing protein 1 (Homo sapiens OX%3D9606)	59.46	2.72035
Sjc_0001281	Similar to Mks1: Meckel syndrome type 1 protein homolog (Mus musculus OX%3D10090)	58.4833	2.7399
Sjc_0003286	Similar to Glb1: Beta-galactosidase (Mus musculus OX%3D10090)	58.3333	3.40579
Sjc_0003091	Similar to Ten-m: Teneurin-m (Drosophila melanogaster OX%3D7227)	56.32	2.43633
Sjc_0005757	Structure-specific endonuclease subunit SLX4	55.1467	3.08268
Sjc_0003471	hypothetical protein	54.6967	3.29921
Sjc_0008443	Similar to Cep164: Centrosomal protein of 164 kDa (Mus musculus OX%3D10090)	54.61	2.49994
Sjc_0003607	dna double-strand break repair rad50 ATPase	54.5	2.3973
Sjc_0002931	SJCHGC04091 protein	53.9567	2.51487
Sjc_0000961	sodium channel and clathrin linker 1-like	53.25	2.44775
Sjc_0005824	Transforming protein	53.19	2.66499
Sjc_0007076	Similar to O-fut1: GDP-fucose protein O-fucosyltransferase 1 (Drosophila melanogaster OX%3D7227)	53.17	2.90387
Sjc_0007404	Claspin	52.6967	2.76565
Sjc_0006788	SJCHGC03974 protein	50.6267	2.33476
Sjc_0007285	Similar to CCDC88C: Protein Daple (Homo sapiens OX%3D9606)	49.7567	3.33984
Sjc_0005727	Similar to myof: Myoferlin (Xenopus tropicalis OX%3D8364)	49.6133	2.90095
Sjc_0002165	Similar to Dhrs1: Dehydrogenase/reductase SDR family member 1 (Mus musculus OX%3D10090)	49.6133	2.64856
Sjc_0003249	Coiled-coil domain-containing protein	48.9433	2.40458
Sjc_0008989	Phosphatidylinositol N-acetylglucosaminyltransferase subunit Q	48.3867	3.03431
Sjc_0000923	Similar to A12: Tegument antigen (Schistosoma mansoni OX%3D6183)	48.1667	3.66038
Sjc_0002764	Similar to Ttk: Dual specificity protein kinase TTK (Mus musculus OX%3D10090)	47.9467	3.51805
Sjc_0000483	Similar to Dynein light chain LC6%2C flagellar outer arm (Heliocidaris crassispina OX%3D1043166)	47.64	2.69857
Sjc_0004482	Similar to Brip1: Fanconi anemia group J protein homolog (Mus musculus OX%3D10090)	47.4033	3.32929
Sjc_0004005	Similar to LITAF: Lipopolysaccharide-induced tumor necrosis factor-alpha factor homolog (Gallus gallus OX%3D9031)	46.9233	3.37525
Sjc_0001215	Similar to PTK7: Inactive tyrosine-protein kinase 7 (Gallus gallus OX%3D9031)	46.8733	2.37781
Sjc_0001557	Similar to Ydjc: Carbohydrate deacetylase (Mus musculus OX%3D10090)	45.75	3.04574
Sjc_0005508	Similar to CASP7: Caspase-7 (Mesocricetus auratus OX%3D10036)	45.2267	2.93482
Sjc_0000930	Equilibrative nucleoside transporter 1	45.18	3.93564
Sjc_0004280	Similar to Hmcn1: Hemicentin-1 (Mus musculus OX%3D10090)	45.1167	3.67409
Sjc_0007681	Similar to CCNB3: G2/mitotic-specific cyclin-B3 (Gallus gallus OX%3D9031)	45.0533	3.70118
Sjc_0004199	Similar to Sox4: Transcription factor SOX-4 (Mus musculus OX%3D10090)	45.0067	2.74668
Sjc_0001300	Similar to EXO1: Exonuclease 1 (Homo sapiens OX%3D9606)	44.97	3.2436
Sjc_0006015	Similar to chtf18: Chromosome transmission fidelity protein 18 homolog (Xenopus laevis OX%3D8355)	44.3933	2.75378
Sjc_0003216	Similar to Pole: DNA polymerase epsilon catalytic subunit A (Mus musculus OX%3D10090)	44.16	2.55628
Sjc_0004655	SJCHGC07106 protein	44.0667	2.77313
Sjc_0009252	Similar to Nnt: NAD(P) transhydrogenase%2C mitochondrial (Mus musculus OX%3D10090)	44.02	4.15558
Sjc_0003948	Similar to ATR: Serine/threonine-protein kinase ATR (Homo sapiens OX%3D9606)	41.86	3.03737
Sjc_0002394	hypothetical protein	40.48	2.82191
Sjc_0001786	Cytoskeleton-associated protein 5	40.25	2.89304
Sjc_0009350	Protein of unknown function	39.4767	3.3334
Sjc_0002796	tumor suppressor p53 binding 1	39.4167	3.19132
Sjc_0007402	hypothetical protein	39.2867	3.42151
Sjc_0005243	Similar to mastl: Serine/threonine-protein kinase greatwall (Xenopus tropicalis OX%3D8364)	38.3567	2.37215
Sjc_0004966	hypothetical protein	36.7833	3.56389
Sjc_0004902	hypothetical protein	36.5633	2.99263
Sjc_0004481	Similar to kif4: Chromosome-associated kinesin KIF4 (Xenopus laevis OX%3D8355)	36.42	2.5061
Sjc_0001020	Similar to NGFR: Tumor necrosis factor receptor superfamily member 16 (Gallus gallus OX%3D9031)	35.5967	2.39251
Sjc_0000377	telomere associated RIF1	34.8833	2.38019
Sjc_0006459	Similar to ORC4: Origin recognition complex subunit 4 (Homo sapiens OX%3D9606)	34.15	2.86813
Sjc_0004176	Similar to Bbs1: Bardet-Biedl syndrome 1 protein homolog (Mus musculus OX%3D10090)	32.52	3.61668
Sjc_0001647	Similar to Slc33a1: Acetyl-coenzyme A transporter 1 (Mus musculus OX%3D10090)	32.4467	4.19839
Sjc_0006868	Similar to MYH14: Myosin-14 (Homo sapiens OX%3D9606)	32.35	2.3304
Sjc_0004755	Docking protein	31.76	3.92341
Sjc_0004177	Similar to psmc3ip: Homologous-pairing protein 2 homolog (Xenopus laevis OX%3D8355)	31.72	2.74206
Sjc_0001229	Similar to dtl: Denticleless protein homolog (Danio rerio OX%3D7955)	31.6833	2.64796
Sjc_0009376	hypothetical protein	31.2133	2.81789
Sjc_0003663	60S ribosomal L8	31.2067	3.21824
Sjc_0005200	hypothetical protein	30.8633	2.36803
Sjc_0007083	Similar to Lhfpl4: LHFPL tetraspan subfamily member 4 protein (Mus musculus OX%3D10090)	30.69	3.91165
Sjc_0003998	Aspartate ornithine carbamoyltransferase	30.3433	2.66001
Sjc_0001440	Similar to ds: Protein dachsous (Drosophila melanogaster OX%3D7227)	29.8267	2.63179
Sjc_0003982	Similar to Pak3: Serine/threonine-protein kinase PAK 3 (Rattus norvegicus OX%3D10116)	29.7133	3.41869
Sjc_0008101	caspase recruitment domain	29.18	2.68198
Sjc_0003698	Tyrosine protein phosphatase non receptor type	28.94	2.37711
Sjc_0002423	Similar to Ido1: Indoleamine 2%2C3-dioxygenase 1 (Rattus norvegicus OX%3D10116)	28.75	2.95313
Sjc_0008141	hypotheticial protein	28.7333	2.51899
Sjc_0003097	Similar to Helq: Helicase POLQ-like (Mus musculus OX%3D10090)	28.52	3.13858
Sjc_0008423	SJCHGC02376 protein	27.38	2.65111
Sjc_0007944	Similar to scra: Anillin (Drosophila melanogaster OX%3D7227)	27.2267	2.9778
Sjc_0007864	family S10 non-peptidase homologue (S10 family)	27.0567	2.7507
Sjc_0008259	hypothetical protein MS3_07422	26.01	2.4417
Sjc_0004011	hypothetical protein	25.87	3.44129
Sjc_0003676	Similar to slc52a3b: Solute carrier family 52%2C riboflavin transporter%2C member 3-B (Danio rerio OX%3D7955)	25.7667	2.49477
Sjc_0008374	hypothetical protein	25.55	2.49173
Sjc_0000931	Equilibrative nucleoside transporter 3	25.09	3.56838
Sjc_0003436	Similar to POLQ: DNA polymerase theta (Homo sapiens OX%3D9606)	23.8267	2.572
Sjc_0007475	SJCHGC05116 protein	23.7967	3.53173
Sjc_0000498	hypothetical protein	22.98	3.53434
Sjc_0006827	Similar to Lin9: Protein lin-9 homolog (Mus musculus OX%3D10090)	22.9433	2.62108
Sjc_0005671	hypothetical protein	22.55	2.59801
Sjc_0009617	hypothetical protein	22.2	2.59176
Sjc_0007388	Similar to AQP1: Aquaporin-1 (Pongo abelii OX%3D9601)	22.1067	2.58808
Sjc_0006377	Similar to ABCG2: ATP-binding cassette sub-family G member 2 (Macaca mulatta OX%3D9544)	21.8867	2.7895
Sjc_0005579	Phosphatidylinositol 3-kinase regulatory subunit alpha	21.8533	3.48874
Sjc_0007891	SJCHGC03382 protein	21.39	2.89489
Sjc_0004179	KGB35222.1 Anosmin-1	21.1033	2.49583
Sjc_0007559	Similar to ANOS1: Anosmin-1 (Homo sapiens OX%3D9606)	20.63	2.91965
Sjc_0006779	Similar to Kif26a: Kinesin-like protein KIF26A (Mus musculus OX%3D10090)	20.4333	2.43712
Sjc_0007549	hypothetical protein	20.0833	2.64533
Sjc_0009761	prenyltransferase alpha subunit repeat-containing 1	19.96	4.26448
Sjc_0003123	Similar to Shab: Potassium voltage-gated channel protein Shab (Drosophila melanogaster OX%3D7227)	19.4233	2.43678
Sjc_0007815	Rho GTPase-activating protein 19	19.2	2.74016
Sjc_0006069	SJCHGC03511 protein	18.3067	3.84144
Sjc_0006113	Protein shifted	18.0433	3.62349
Sjc_0001443	SJCHGC03642 protein	17.8733	2.75224
Sjc_0005510	Similar to primpol: DNA-directed primase/polymerase protein (Danio rerio OX%3D7955)	17.4333	2.73775
Sjc_0004441	hypothetical protein	16.78	2.57695
Sjc_0007092	SJCHGC07509 protein	16.11	2.67226
Sjc_0006385	Similar to BRCA2A: Protein BREAST CANCER SUSCEPTIBILITY 2 homolog A (Arabidopsis thaliana OX%3D3702)	16.1	2.46454
Sjc_0009458	S phase cyclin A-associated protein in the endoplasmic reticulum	15.7867	3.10224
Sjc_0004539	Similar to FUT8: Alpha-(1%2C6)-fucosyltransferase (Homo sapiens OX%3D9606)	15.5867	3.41917
Sjc_0007814	Rho GTPase-activating protein 19	15.01	2.42345
Sjc_0003335	Similar to FZD10: Frizzled-10 (Gallus gallus OX%3D9031)	13.92	2.92985
Sjc_0007401	uncharacterized protein DC041_0011894	13.87	3.5555
Sjc_0003704	Similar to LIMS2: LIM and senescent cell antigen-like-containing domain protein 2 (Homo sapiens OX%3D9606)	13.8633	3.89238
Sjc_0003750	SJCHGC07783 protein	13.6367	2.57104
Sjc_0007739	hypothetical protein	13.3833	2.36697
Sjc_0002410	histidine kinase	13.2633	2.70176
Sjc_0004429	Similar to Nep4: Neprilysin-4 (Drosophila melanogaster OX%3D7227)	13.2367	3.20736
Sjc_0002819	Similar to TBC1D31: TBC1 domain family member 31 (Bos taurus OX%3D9913)	13.0333	2.76894
Sjc_0007560	Similar to ANOS1: Anosmin-1 (Homo sapiens OX%3D9606)	12.8767	2.52175
Sjc_0009287	SJCHGC00851 protein	12.1	3.45254
Sjc_0002868	Oxalate:formate antiporter	11.8933	3.19449
Sjc_0002831	Similar to TSTA3: GDP-L-fucose synthase (Homo sapiens OX%3D9606)	11.0633	2.8771
Sjc_0009723	Similar to CETN3: Centrin-3 (Homo sapiens OX%3D9606)	10.1233	3.27553
Sjc_0007734	SJCHGC03809 protein	9.67667	2.89381
Sjc_0004010	hypothetical protein	9.54667	2.41471
Sjc_0009470	SJCHGC04690 protein	9.51	2.78428
Sjc_0008055	SJCHGC08940 protein	9.07	3.13896
Sjc_0000278	Similar to RREB1: Ras-responsive element-binding protein 1 (Gallus gallus OX%3D9031)	8.93	2.32266
Sjc_0003630	Similar to litaf: Lipopolysaccharide-induced tumor necrosis factor-alpha factor homolog (Xenopus tropicalis OX%3D8364)	8.65	2.55505
Sjc_0009262	hypothetical protein	8.64667	2.81859
Sjc_0004284	Similar to HMCN1: Hemicentin-1 (Homo sapiens OX%3D9606)	8.35667	2.66495
Sjc_0003693	Similar to hb: Protein hunchback (Fragment) (Clogmia albipunctata OX%3D85120)	5.41333	2.34946
Sjc_0008294	Similar to OLIG2: Oligodendrocyte transcription factor 2 (Gallus gallus OX%3D9031)	3.54333	2.35874

## Sheet: SEG in Cer
GeneID	Gene annotation	Transcript abudance at this stage (TPM)
Sjc_0002753	SJCHGC04269 protein	714.457
Sjc_0007106	SJCHGC02739 protein	432.607
Sjc_0008309	Protein of unknown function	425.693
Sjc_0002755	hypothetical protein	387.3
Sjc_0002020	Protein of unknown function	313.523
Sjc_0003473	phosphatase 3 regulatory subunit	266.697
Sjc_0001966	DM9 domain-containing protein	261.533
Sjc_0000153	Similar to HAEM: Hemoglobinase (Schistosoma japonicum OX%3D6182)	182.82
Sjc_0002273	Similar to CATB: Cathepsin B-like cysteine proteinase (Schistosoma japonicum OX%3D6182)	163.273
Sjc_0000247	Tegument antigen	162.293
Sjc_0003660	SJCHGC02563 protein	133.687
Sjc_0002710	Similar to Lcat: Phosphatidylcholine-sterol acyltransferase (Mus musculus OX%3D10090)	118.283
Sjc_0003827	Uroporphyrinogen decarboxylase	103.007
Sjc_0000152	Similar to HAEM: Hemoglobinase (Schistosoma japonicum OX%3D6182)	100.28
Sjc_0002752	hypothetical protein	82.0533
Sjc_0003394	adenylate cyclase	81.3667
Sjc_0002278	Similar to CATB: Cathepsin B-like cysteine proteinase (Schistosoma japonicum OX%3D6182)	78.3633
Sjc_0009198	tetraspanin-CD63 receptor	71.2333
Sjc_0002025	Similar to Cathepsin B-like cysteine proteinase (Schistosoma mansoni OX%3D6183)	64.7967
Sjc_0000117	25 kDa integral membrane protein	58.24
Sjc_0007466	Saposin B domain-containing protein	57.8467
Sjc_0002295	Similar to CATB: Cathepsin B-like cysteine proteinase (Schistosoma japonicum OX%3D6182)	53.1067
Sjc_0005645	SJCHGC07500 protein	49.7067
Sjc_0007309	SJCHGC00277 protein	46.31
Sjc_0002266	Similar to CATB: Cathepsin B-like cysteine proteinase (Schistosoma japonicum OX%3D6182)	42.3567
Sjc_0009521	Similar to GenBank Accession Number AE003799 CG5174 gene product in Drosophila melanogaster	34.2567
Sjc_0007613	SJCHGC00969 protein	30.5167
Sjc_0008791	hypothetical protein	28.2167
Sjc_0000050	Similar to Cat-1: Cathepsin L-like proteinase (Fasciola hepatica OX%3D6192)	27.07
Sjc_0008015	hypothetical protein	23.63
Sjc_0000125	25 kDa integral membrane protein	22.7767
Sjc_0002522	rhodopsin-like orphan GPCR	22.75
Sjc_0002754	SJCHGC04269 protein	18.8633
Sjc_0008216	SJCHGC08962 protein	18.7333
Sjc_0005067	Similar to Slc6a3: Sodium-dependent dopamine transporter (Rattus norvegicus OX%3D10116)	16.34
Sjc_0002556	hypothetical protein	15.9933
Sjc_0000333	SJCHGC04841 protein	15.9433
Sjc_0009407	Similar to AQP9: Aquaporin-9 (Homo sapiens OX%3D9606)	15.8167
Sjc_0006794	SJCHGC09492 protein	15.2167
Sjc_0002486	Similar to Ppt1: Palmitoyl-protein thioesterase 1 (Mus musculus OX%3D10090)	14.1267
Sjc_0000335	hypothetical protein MS3_07457, partial	14.0767
Sjc_0007230	Solute carrier family 43 member 3	13.84
Sjc_0000131	25 kDa integral membrane protein	13.7533
Sjc_0001326	Mitochondrial fission 1 protein	13.1233
Sjc_0009126	hypothetical protein Smp_212350	12.5767
Sjc_0006668	hypothetical protein	12.15
Sjc_0002279	Similar to CATB: Cathepsin B-like cysteine proteinase (Schistosoma japonicum OX%3D6182)	12.05
Sjc_0007614	Protein of unknown function	11.22
Sjc_0000845	Similar to gcnt3: Beta-1%2C3-galactosyl-O-glycosyl-glycoprotein beta-1%2C6-N-acetylglucosaminyltransferase 3 (Xenopus laevis OX%3D8355)	10.6333
Sjc_0007231	Similar to Slc43a3: Solute carrier family 43 member 3 (Mus musculus OX%3D10090)	9.71
Sjc_0007310	SJCHGC02459 protein	9.02
Sjc_0002280	Similar to CATB: Cathepsin B-like cysteine proteinase (Schistosoma japonicum OX%3D6182)	8.64
Sjc_0008671	degenerin unc-8	8.63333
Sjc_0000277	Similar to Slc7a14: Probable cationic amino acid transporter (Mus musculus OX%3D10090)	8.60333
Sjc_0000049	Similar to Cat-1: Cathepsin L-like proteinase (Fasciola hepatica OX%3D6192)	8.19667
Sjc_0004535	MKRN2 opposite strand -like	8.04
Sjc_0009411	Similar to AQP9: Aquaporin-9 (Homo sapiens OX%3D9606)	7.39333
Sjc_0000336	Protein of unknown function	7.18
Sjc_0003912	Protein of unknown function	6.94
Sjc_0000033	Similar to Ctss: Cathepsin S (Mus musculus OX%3D10090)	6.36667
Sjc_0007911	Similar to NIM1K: Serine/threonine-protein kinase NIM1 (Homo sapiens OX%3D9606)	6.26667
Sjc_0001102	Protein of unknown function	5.88333
Sjc_0005066	Similar to SLC6A3: Sodium-dependent dopamine transporter (Bos taurus OX%3D9913)	5.68667
Sjc_0000123	25 kDa integral membrane protein	5.66
Sjc_0007455	Protein of unknown function	5.61667
Sjc_0001779	Similar to CATB: Cathepsin B-like cysteine proteinase (Schistosoma japonicum OX%3D6182)	5.22333
Sjc_0002009	SJCHGC04025 protein	5.18667
Sjc_0004780	Protein of unknown function	4.84
Sjc_0002690	SJCHGC07956 protein	4.74667
Sjc_0007275	Similar to Octbeta2R: Octopamine receptor beta-2R (Drosophila melanogaster OX%3D7227)	4.64
Sjc_0007464	Saposin-like protein	4.48667
Sjc_0006544	Protein of unknown function	4.47
Sjc_0008521	Annexin A10	4.32
Sjc_0007562	Similar to TMEM45B: Transmembrane protein 45B (Bos taurus OX%3D9913)	4.11333
Sjc_0007312	hypothetical protein Smp_181060	4.09667
Sjc_0001022	amine GPCR	4
Sjc_0005244	Similar to Extracellular superoxide dismutase [Cu-Zn] (Schistosoma mansoni OX%3D6183)	3.89667
Sjc_0004292	SJCHGC02937 protein	3.85333
Sjc_0000945	Similar to gcnt3: Beta-1%2C3-galactosyl-O-glycosyl-glycoprotein beta-1%2C6-N-acetylglucosaminyltransferase 3 (Xenopus laevis OX%3D8355)	3.75
Sjc_0007845	SJCHGC08962 protein	3.72
Sjc_0000128	Similar to 25 kDa integral membrane protein (Schistosoma japonicum OX%3D6182)	3.62333
Sjc_0006317	Similar to cracr2b: EF-hand calcium-binding domain-containing protein 4A (Danio rerio OX%3D7955)	3.43333
Sjc_0002283	Similar to RNS1: Ribonuclease 1 (Arabidopsis thaliana OX%3D3702)	3.38
Sjc_0009410	Similar to AQP4: Aquaporin-4 (Milnesium tardigradum OX%3D46460)	3.36333
Sjc_0007913	SJCHGC02744 protein	3.26
Sjc_0004479	hypothetical protein	2.94667
Sjc_0000395	PAN domain-containing-like protein	2.87667
Sjc_0003911	hypothetical protein	2.84333
Sjc_0005822	Centromere protein	2.82
Sjc_0002344	hypothetical protein	2.73333
Sjc_0002361	hypothetical protein	2.71667
Sjc_0008012	hypothetical protein	2.69667
Sjc_0000133	25 kDa integral membrane protein	2.59667
Sjc_0007848	SJCHGC08257 protein	2.49333
Sjc_0008400	SJCHGC00710 protein	2.48667
Sjc_0008271	UPF0506 protein	2.48333
Sjc_0008495	Similar to Hnf4g: Hepatocyte nuclear factor 4-gamma (Mus musculus OX%3D10090)	2.34667
Sjc_0009476	Down syndrome cell adhesion molecule	2.23333
Sjc_0002955	Similar to Best3: Bestrophin-3 (Mus musculus OX%3D10090)	2.20333
Sjc_0001997	Similar to Mark4: MAP/microtubule affinity-regulating kinase 4 (Mus musculus OX%3D10090)	2.19333
Sjc_0006086	Similar to ALPP: Alkaline phosphatase%2C placental type (Homo sapiens OX%3D9606)	2.14333
Sjc_0007861	SJCHGC08257 protein	2.04333
Sjc_0004251	SJCHGC00620 protein	2.03
Sjc_0004581	hypothetical protein	1.98
Sjc_0008810	hypotheticial protein	1.95
Sjc_0000208	Similar to Cat-1: Cathepsin L-like proteinase (Fasciola hepatica OX%3D6192)	1.89333
Sjc_0006869	SJCHGC05466 protein	1.89333
Sjc_0001596	hypothetical protein	1.89
Sjc_0004583	hypothetical protein	1.86667
Sjc_0006220	Similar to ETV4: ETS translocation variant 4 (Homo sapiens OX%3D9606)	1.83333
Sjc_0009304	hypothetical protein	1.80667
Sjc_0004126	unnamed protein product	1.80333
Sjc_0001403	uncharacterized protein DC041_0005410	1.74
Sjc_0009588	Protein of unknown function	1.72333
Sjc_0005567	paired mesoderm homeobox protein 2	1.61333
Sjc_0008444	Similar to NAGA: Alpha-N-acetylgalactosaminidase (Gallus gallus OX%3D9031)	1.60667
Sjc_0002557	Protein of unknown function	1.58667
Sjc_0005681	DNA replication licensing factor MCM8, putative	1.56333
Sjc_0001785	Protein of unknown function	1.52667
Sjc_0008524	Similar to ANXA5: Annexin A5 (Bos taurus OX%3D9913)	1.41333
Sjc_0007846	SJCHGC08257 protein	1.39667
Sjc_0000995	Protein of unknown function	1.35667
Sjc_0005317	Doublesex and mab 3 transcription	1.32667
Sjc_0007860	SJCHGC08962 protein	1.27
Sjc_0006513	Proton-coupled folate transporter	1.25667
Sjc_0009708	SJCHGC09323 protein	1.22333
Sjc_0001622	Similar to vmp1: Vacuole membrane protein 1 (Xenopus tropicalis OX%3D8364)	1.18667
Sjc_0000926	Octopamine receptor	1.17
Sjc_0008192	Similar to CLEC16A: Protein CLEC16A (Homo sapiens OX%3D9606)	1.17
Sjc_0004456	Protein of unknown function	1.15667
Sjc_0000361	Peroxidasin-like protein	1.15333
Sjc_0007858	hypothetical protein	1.10667
Sjc_0001855	Cell number regulator 11	1.09667
Sjc_0000362	Peroxidasin-like protein	1.08333
Sjc_0006327	putative slit	1.08
Sjc_0004109	Protein of unknown function	0.976667
Sjc_0002183	Protein of unknown function	0.97
Sjc_0004612	hypotheticial protein	0.93
Sjc_0003313	putative glutamate receptor	0.876667
Sjc_0007677	Similar to EVX1: Homeobox even-skipped homolog protein 1 (Homo sapiens OX%3D9606)	0.78
Sjc_0008788	hypothetical protein	0.743333

## Sheet: EEG in Cer
GeneID	Gene annotation	Transcript abudance(TPM)	log2FoldChange
Sjc_0003236	Similar to Calcium-binding protein (Schistosoma mansoni OX%3D6183)	112658	6.01327
Sjc_0003954	cercarial stage-specific protein Sj20H8	30538.3	5.89975
Sjc_0000515	Similar to Glul: Glutamine synthetase (Mus musculus OX%3D10090)	6624.61	2.32403
Sjc_0001959	Similar to COF1: Cofilin (Ustilago maydis (strain 521 / FGSC 9021) OX%3D237631)	3388.61	2.61383
Sjc_0003953	SJCHGC07068 protein	2029.75	4.98103
Sjc_0001965	DM9 domain-containing protein	1557.05	3.92213
Sjc_0002430	SJCHGC01155 protein	1429.11	4.99296
Sjc_0006000	Similar to Hexokinase (Schistosoma mansoni OX%3D6183)	1403.64	2.8314
Sjc_0001293	Similar to car1: Arginase (Schizosaccharomyces pombe (strain 972 / ATCC 24843) OX%3D284812)	1318.28	5.32547
Sjc_0003235	EF hand protein	1141.08	7.34341
Sjc_0000674	PDZ and LIM domain protein Zasp	1016.9	2.57866
Sjc_0002329	Similar to HINT2: Histidine triad nucleotide-binding protein 2%2C mitochondrial (Homo sapiens OX%3D9606)	1011.52	2.36332
Sjc_0003955	SJCHGC06358 protein	963.207	4.8767
Sjc_0000246	Tegument antigen	891.707	6.22107
Sjc_0000004	Similar to CD63: CD63 antigen (Bos taurus OX%3D9913)	862.72	4.62522
Sjc_0008124	SJCHGC06586 protein	709.09	3.18429
Sjc_0000011	Similar to Cnn3: Calponin-3 (Rattus norvegicus OX%3D10116)	696.74	2.8952
Sjc_0002271	Similar to CATB: Cathepsin B-like cysteine proteinase (Schistosoma japonicum OX%3D6182)	657.143	6.0859
Sjc_0007313	Saposin-like,IPR008139 Saposin B,domain-containing protein	611.65	6.17437
Sjc_0008372	putative calmodulin (CaM)	556.237	6.24782
Sjc_0004697	Similar to FBXO25: F-box only protein 25 (Bos taurus OX%3D9913)	540.787	2.55392
Sjc_0002267	Similar to CATB: Cathepsin B-like cysteine proteinase (Schistosoma japonicum OX%3D6182)	535.67	6.07945
Sjc_0007465	Saposin-like,IPR008139 Saposin B,domain-containing protein	527.73	6.27983
Sjc_0005816	SJCHGC05585 protein	514.51	6.05027
Sjc_0000493	Similar to DYNLL1: Dynein light chain 1%2C cytoplasmic (Bos taurus OX%3D9913)	499.563	4.45183
Sjc_0008270	Similar to SJCHGC09800: Uncharacterized protein SJCHGC09800 (Schistosoma japonicum OX%3D6182)	495.15	3.45817
Sjc_0002264	Similar to CATB: Cathepsin B-like cysteine proteinase (Schistosoma japonicum OX%3D6182)	464.637	6.10135
Sjc_0000045	Similar to Cat-1: Cathepsin L-like proteinase (Fasciola hepatica OX%3D6192)	440.863	6.24355
Sjc_0005260	Similar to Upp2: Uridine phosphorylase 2 (Mus musculus OX%3D10090)	435.653	4.19851
Sjc_0002294	Similar to CATB: Cathepsin B-like cysteine proteinase (Schistosoma japonicum OX%3D6182)	409.603	6.00651
Sjc_0008485	Annexin A13 (Annexin XIII)	404.183	3.41434
Sjc_0005384	Similar to tlcd2: TLC domain-containing protein 2 (Danio rerio OX%3D7955)	379.56	3.21613
Sjc_0003233	SJCHGC09767 protein	375.01	5.04713
Sjc_0001126	hypothetical protein	348.4	2.8967
Sjc_0000046	Similar to Cat-1: Cathepsin L-like proteinase (Fasciola hepatica OX%3D6192)	348.337	6.24255
Sjc_0006368	Troponin I	336.93	6.23476
Sjc_0000248	Tegument antigen	328.84	5.57148
Sjc_0002985	Similar to PLAC8: Placenta-specific gene 8 protein (Bos taurus OX%3D9913)	323.647	2.80354
Sjc_0004645	Similar to Tmprss11c: Transmembrane protease serine 11C (Mus musculus OX%3D10090)	316.917	3.13365
Sjc_0000899	Similar to DLC: Dynein light chain (Schistosoma mansoni OX%3D6183)	305.023	7.84707
Sjc_0006956	PDZ and LIM domain Zasp	288.103	2.73039
Sjc_0009364	Similar to RABA2A: Ras-related protein RABA2a (Arabidopsis thaliana OX%3D3702)	281.153	4.4893
Sjc_0002092	DM9 domain-containing protein	276.783	2.39839
Sjc_0009370	TNN16301.1 tetraspanin-CD63 receptor	274.927	4.95593
Sjc_0006159	Similar to Mlp84B: Muscle LIM protein Mlp84B (Drosophila melanogaster OX%3D7227)	274.017	3.2391
Sjc_0002124	hypothetical protein	272.37	5.86472
Sjc_0005937	Similar to ANXA7: Annexin A7 (Homo sapiens OX%3D9606)	267.217	3.26942
Sjc_0007314	Similar to Glut1: Glucose transporter type 1 (Drosophila melanogaster OX%3D7227)	266.243	5.98999
Sjc_0005156	Similar to Tmbim1: Protein lifeguard 3 (Mus musculus OX%3D10090)	258.057	3.89998
Sjc_0008045	Similar to Klf11: Krueppel-like factor 11 (Mus musculus OX%3D10090)	248.083	2.98588
Sjc_0003952	SJCHGC06242 protein	247.737	5.41373
Sjc_0003490	Protein of unknown function	228.86	2.89441
Sjc_0002098	Similar to PRY1: Protein PRY1 (Saccharomyces cerevisiae (strain ATCC 204508 / S288c) OX%3D559292)	222.897	2.41579
Sjc_0004415	hypothetical protein	222.19	3.15847
Sjc_0002277	Similar to CATB: Cathepsin B-like cysteine proteinase (Schistosoma japonicum OX%3D6182)	197.15	6.05483
Sjc_0004210	Similar to PLAC8L1: PLAC8-like protein 1 (Homo sapiens OX%3D9606)	196.43	2.82707
Sjc_0002274	Similar to CATB: Cathepsin B-like cysteine proteinase (Schistosoma japonicum OX%3D6182)	191.937	6.06247
Sjc_0005704	Proteasome activator complex subunit 4	189.443	3.46588
Sjc_0007390	Glucosamine-fructose-6-phosphate aminotransferase	182.677	2.51497
Sjc_0001979	Similar to ada: Adenosine deaminase (Xenopus laevis OX%3D8355)	174.667	4.46711
Sjc_0003237	Similar to 16 kDa calcium-binding protein (Schistosoma mansoni OX%3D6183)	168.383	3.17225
Sjc_0003829	SJCHGC08408 protein	168.15	5.24479
Sjc_0002510	SJCHGC06540 protein	165.25	6.9752
Sjc_0003646	SJCHGC09134 protein	163.857	2.72258
Sjc_0005492	Similar to CHKB: Choline/ethanolamine kinase (Homo sapiens OX%3D9606)	158.05	3.02808
Sjc_0002936	SJCHGC09717 protein	155.717	3.90703
Sjc_0003392	adenylate cyclase	148.487	5.68804
Sjc_0009199	tetraspanin-CD63 receptor	141.45	6.56468
Sjc_0008627	Similar to unc-16: JNK-interacting protein (Caenorhabditis elegans OX%3D6239)	139.79	2.81766
Sjc_0005501	Similar to AMHR2: Anti-Muellerian hormone type-2 receptor (Oryctolagus cuniculus OX%3D9986)	138.387	3.03164
Sjc_0008486	Similar to Anxa13: Annexin A13 (Mus musculus OX%3D10090)	136.387	2.88087
Sjc_0001955	DM9 domain-containing protein	135.06	4.68499
Sjc_0000929	Similar to Phtf2: Putative homeodomain transcription factor 2 (Mus musculus OX%3D10090)	128.75	2.68306
Sjc_0002099	Similar to Ectin (Fragment) (Acropora millepora OX%3D45264)	128.047	4.45374
Sjc_0005320	SJCHGC02683 protein	124.647	3.01343
Sjc_0003327	Similar to SLC13A2: Solute carrier family 13 member 2 (Homo sapiens OX%3D9606)	118.093	4.86506
Sjc_0002261	Similar to CATB: Cathepsin B-like cysteine proteinase (Schistosoma japonicum OX%3D6182)	118.02	5.95941
Sjc_0007311	SJCHGC00347 protein	116.95	6.19577
Sjc_0006797	Saposin B domain-containing protein	115.147	4.69302
Sjc_0009494	Aquaporin-like domain-containing protein	108.287	4.46854
Sjc_0001322	Similar to Dram2: DNA damage-regulated autophagy modulator protein 2 (Mus musculus OX%3D10090)	107.537	4.41206
Sjc_0005245	Similar to Extracellular superoxide dismutase [Cu-Zn] (Schistosoma mansoni OX%3D6183)	102.737	2.58532
Sjc_0007892	SJCHGC08831 protein	102.24	2.57951
Sjc_0005385	Similar to Ano8: Anoctamin-8 (Mus musculus OX%3D10090)	99.2533	2.6075
Sjc_0007460	hypothetical protein	94.6533	6.28775
Sjc_0000486	Similar to Dynein light chain LC6%2C flagellar outer arm (Heliocidaris crassispina OX%3D1043166)	93.86	5.6503
Sjc_0005823	Similar to PRKAG2: 5'-AMP-activated protein kinase subunit gamma-2 (Homo sapiens OX%3D9606)	91.0967	3.94182
Sjc_0002562	zinc finger protein	89.39	3.12856
Sjc_0006350	Similar to AG8: Severin (Echinococcus granulosus OX%3D6210)	87.4133	2.62362
Sjc_0008509	putative annexin	87.0267	6.75761
Sjc_0005683	Similar to rabA: Ras-related protein RabA (Dictyostelium discoideum OX%3D44689)	86.02	6.19598
Sjc_0006434	Similar to KIAA1324L: UPF0577 protein KIAA1324-like (Homo sapiens OX%3D9606)	85.6467	3.24032
Sjc_0005233	Similar to ADAMTSL1: ADAMTS-like protein 1 (Homo sapiens OX%3D9606)	82.36	3.3268
Sjc_0000332	SJCHGC03068 protein	82.3467	4.48698
Sjc_0002521	rhodopsin-like orphan GPCR	81.6433	3.2282
Sjc_0004968	hypothetical protein	81.49	4.53484
Sjc_0005710	Similar to twk-7: TWiK family of potassium channels protein 7 (Caenorhabditis elegans OX%3D6239)	80.92	2.39025
Sjc_0003234	putative calmodulin	80.8733	5.7208
Sjc_0008057	hypothetical protein	78.2367	6.64158
Sjc_0000813	Similar to odd: Protein odd-skipped (Drosophila melanogaster OX%3D7227)	75.99	3.92535
Sjc_0005056	Similar to Slc25a15: Mitochondrial ornithine transporter 1 (Rattus norvegicus OX%3D10116)	75.72	2.78834
Sjc_0000566	Protein rolling stone	75.3733	3.94828
Sjc_0005644	SJCHGC07500 protein	75.34	6.76211
Sjc_0000439	Similar to endou-c: Poly(U)-specific endoribonuclease-C (Xenopus laevis OX%3D8355)	74.6167	2.54997
Sjc_0007612	Zinc finger, C2H2-type domain-containing protein	74.2433	6.61441
Sjc_0008165	GLIPR1-like protein	72.4833	4.03615
Sjc_0006465	Similar to SM21.7: Antigen Sm21.7 (Schistosoma mansoni OX%3D6183)	71.0733	5.30809
Sjc_0003599	Similar to LITAF: Lipopolysaccharide-induced tumor necrosis factor-alpha factor homolog (Gallus gallus OX%3D9031)	70.2067	6.10923
Sjc_0004339	Similar to MAP2K1: Dual specificity mitogen-activated protein kinase kinase 1 (Fragment) (Serinus canaria OX%3D9135)	69.11	2.37864
Sjc_0005834	Similar to CTSA: Lysosomal protective protein (Bos taurus OX%3D9913)	67.8367	5.27181
Sjc_0004647	SJCHGC04080 protein	67.78	2.82209
Sjc_0007819	Similar to ACT: Actin%2C gamma (Penicillium chrysogenum OX%3D5076)	65.7333	3.65276
Sjc_0007668	Similar to Sorbs2: Sorbin and SH3 domain-containing protein 2 (Mus musculus OX%3D10090)	65.7033	2.77946
Sjc_0003956	SJCHGC09570 protein	65.0433	3.17275
Sjc_0000334	SJCHGC03068 protein	65.0067	4.23699
Sjc_0000331	SJCHGC03061 protein	62.34	3.37612
Sjc_0001164	Sphingomyelin synthase-related 1	62.31	2.80789
Sjc_0000294	Similar to Calpain (Schistosoma mansoni OX%3D6183)	61.7567	5.43276
Sjc_0002127	SJCHGC01860 protein	58.9167	5.897
Sjc_0002268	Similar to Cathepsin B-like cysteine proteinase (Schistosoma mansoni OX%3D6183)	57.89	7.20453
Sjc_0003250	putative pi3kinase	56.91	2.81269
Sjc_0008656	Similar to DYNC1LI1: Cytoplasmic dynein 1 light intermediate chain 1 (Homo sapiens OX%3D9606)	56.3067	2.48244
Sjc_0005897	Similar to HGPRT: Hypoxanthine-guanine phosphoribosyltransferase (Schistosoma mansoni OX%3D6183)	55.7767	2.8865
Sjc_0002014	SJCHGC02532 protein	53.7	6.02894
Sjc_0000155	Abnormal spindle-like microcephaly-associated protein	52.73	3.60491
Sjc_0005570	SJCHGC06519 protein	51.8667	5.58483
Sjc_0005987	Ras-associated and pleckstrin homology domains-containing protein 1	49.7933	2.59116
Sjc_0003441	Similar to Asah2: Neutral ceramidase (Rattus norvegicus OX%3D10116)	49.4367	2.44951
Sjc_0009124	hypothetical protein	47.37	4.3318
Sjc_0004580	SJCHGC06386 protein	46.0267	2.34775
Sjc_0000138	Similar to INPP1: Inositol polyphosphate 1-phosphatase (Homo sapiens OX%3D9606)	46.0233	2.43876
Sjc_0003656	SJCHGC08282 protein	45.9167	4.41947
Sjc_0000654	prokaryotic DNA topoisomerase	45.2	4.74745
Sjc_0000106	Similar to DLC: Dynein light chain (Schistosoma mansoni OX%3D6183)	44.7667	3.66362
Sjc_0002101	venom allergen-like (VAL) 6 protein	43.8533	5.19852
Sjc_0000403	Tensin-3, partial	42.27	3.67484
Sjc_0004784	Similar to MYLK: Myosin light chain kinase%2C smooth muscle (Bos taurus OX%3D9913)	41.99	2.9685
Sjc_0009024	Similar to ncs-2: Neuronal calcium sensor 2 (Caenorhabditis elegans OX%3D6239)	41.4667	2.72697
Sjc_0003652	SJCHGC02678 protein	41.15	2.49977
Sjc_0005424	Similar to HOXB1: Homeobox protein Hox-B1 (Ateles geoffroyi OX%3D9509)	40.6767	5.05695
Sjc_0005258	Similar to TEP1: Telomerase protein component 1 (Homo sapiens OX%3D9606)	40.51	3.75233
Sjc_0006569	hypothetical protein	39.5633	3.19291
Sjc_0000965	Similar to trpm2: Transient receptor potential cation channel subfamily M member 2 (Danio rerio OX%3D7955)	38.97	2.51659
Sjc_0008940	Similar to fus: RNA-binding protein fusilli (Drosophila melanogaster OX%3D7227)	38.0167	2.44829
Sjc_0005312	diaminopimelate epimerase	36.0267	6.25732
Sjc_0005457	Similar to CTSD: Cathepsin D (Homo sapiens OX%3D9606)	35.1367	3.54493
Sjc_0001197	NAD+ nucleosidase	33.4333	2.44008
Sjc_0008087	Protein hairy	33.24	2.72465
Sjc_0002008	SJCHGC04025 protein	33.18	4.70798
Sjc_0002100	venom allergen-like (VAL) 6 protein	33.1167	4.59394
Sjc_0005402	Similar to HOXB7: Homeobox protein Hox-B7 (Homo sapiens OX%3D9606)	33.05	2.47162
Sjc_0000648	SJCHGC04328 protein	32.9533	4.06962
Sjc_0006085	Similar to ALPP: Alkaline phosphatase%2C placental type (Homo sapiens OX%3D9606)	32.8567	5.35382
Sjc_0003003	Similar to MYO16: Unconventional myosin-XVI (Homo sapiens OX%3D9606)	32.2667	2.64684
Sjc_0003632	Synaptotagmin-like protein 4	32.2533	2.95234
Sjc_0009125	Forkhead box protein	29.5933	4.00859
Sjc_0007163	Similar to KCND2: Potassium voltage-gated channel subfamily D member 2 (Oryctolagus cuniculus OX%3D9986)	29.3033	2.56544
Sjc_0008172	Similar to Sdcbp: Syntenin-1 (Mus musculus OX%3D10090)	29.1633	6.26018
Sjc_0004904	Similar to DLC: Dynein light chain (Schistosoma mansoni OX%3D6183)	28.9967	3.36567
Sjc_0002054	Similar to ABCA1: ATP-binding cassette sub-family A member 1 (Homo sapiens OX%3D9606)	28.45	4.02086
Sjc_0007459	hypothetical protein	28.1533	5.42326
Sjc_0005423	pyruvate kinase	27.8	5.26974
Sjc_0008269	Similar to SJCHGC09803: Uncharacterized protein SJCHGC09803 (Schistosoma japonicum OX%3D6182)	27.6367	4.1533
Sjc_0002585	Similar to GLIS1: Zinc finger protein GLIS1 (Homo sapiens OX%3D9606)	26.4867	4.2086
Sjc_0003396	adenylate cyclase	26.22	4.06436
Sjc_0004847	Similar to Dyrk3: Putative dual specificity tyrosine-phosphorylation-regulated kinase 3 homolog (Drosophila melanogaster OX%3D7227)	26.14	2.5487
Sjc_0006925	hypothetical protein	25.6467	3.28157
Sjc_0006112	charged multivesicular body protein 2B	25.2733	2.88476
Sjc_0005470	Similar to AAEL006169: Lysosomal aspartic protease (Aedes aegypti OX%3D7159)	25.15	2.67597
Sjc_0009182	Similar to PREP: Prolyl endopeptidase (Homo sapiens OX%3D9606)	23.0667	3.81497
Sjc_0009436	Similar to Atp11a: Probable phospholipid-transporting ATPase IH (Mus musculus OX%3D10090)	23.0167	4.05982
Sjc_0002115	hypothetical protein	22.7467	2.61643
Sjc_0003595	Similar to CDC31: Cell division control protein 31 (Saccharomyces cerevisiae (strain ATCC 204508 / S288c) OX%3D559292)	22.0633	3.14231
Sjc_0005954	Similar to Mfsd12: Major facilitator superfamily domain-containing protein 12 (Mus musculus OX%3D10090)	21.31	3.17716
Sjc_0006847	hypothetical protein	20.4633	2.34169
Sjc_0001500	SJCHGC04078 protein	20.2833	2.59986
Sjc_0007565	hypothetical protein	19.8167	2.41221
Sjc_0000492	Similar to Cdlc2: Dynein light chain 2%2C cytoplasmic (Drosophila melanogaster OX%3D7227)	19.8133	3.43085
Sjc_0009408	Similar to AQP9: Aquaporin-9 (Homo sapiens OX%3D9606)	19.3367	4.04587
Sjc_0008272	Protein of unknown function	19.2267	2.55899
Sjc_0004946	Similar to Arrestin red cell isoform 1 (Oncorhynchus mykiss OX%3D8022)	19.03	3.00435
Sjc_0007274	Similar to 5-HT7: 5-hydroxytryptamine receptor 1 (Drosophila melanogaster OX%3D7227)	18.98	3.44808
Sjc_0004236	hypothetical protein	16.9933	4.46819
Sjc_0003318	Similar to Crip2: Cysteine-rich protein 2 (Mus musculus OX%3D10090)	16.9767	3.95102
Sjc_0006203	Voltage-gated hydrogen channel 1	16.3767	3.07464
Sjc_0004338	Pleckstrin homology domain-containing family G member 6	16.1833	2.90703
Sjc_0004985	Similar to Cathepsin C (Schistosoma mansoni OX%3D6183)	16.03	4.58288
Sjc_0001890	Similar to SGF1: Silk gland factor 1 (Bombyx mori OX%3D7091)	15.9267	3.29983
Sjc_0009141	hypothetical protein MS3_02089	15.8867	2.92316
Sjc_0007117	hypothetical protein	13.73	4.2931
Sjc_0005471	Similar to AAEL006169: Lysosomal aspartic protease (Aedes aegypti OX%3D7159)	12.6733	2.42198
Sjc_0000966	Transient receptor potential cation channel subfamily M member 2	12.1267	3.05283
Sjc_0002550	hypothetical protein	11.8067	2.58294
Sjc_0003059	Similar to PRDM1: PR domain zinc finger protein 1 (Homo sapiens OX%3D9606)	11.4233	2.34144
Sjc_0002049	Calcium activated potassium channel subunit	10.65	3.10323
Sjc_0004260	Similar to OTOF: Otoferlin (Homo sapiens OX%3D9606)	10.5433	3.14836
Sjc_0001284	Similar to UBC12: NEDD8-conjugating enzyme UBC12 (Saccharomyces cerevisiae (strain ATCC 204508 / S288c) OX%3D559292)	9.75667	3.02616
Sjc_0002680	Similar to EYA1: Eyes absent homolog 1 (Homo sapiens OX%3D9606)	8.73333	2.81171
Sjc_0006782	Protein of unknown function	8.39333	2.81676
Sjc_0002328	Similar to TCF7L2: Transcription factor 7-like 2 (Homo sapiens OX%3D9606)	7.95333	3.18673
Sjc_0007841	SJCHGC08962 protein	7.78667	4.01965
Sjc_0000495	hypothetical protein	6.70667	2.86208
Sjc_0006884	Histone deacetylase 4	6.62	3.12257
Sjc_0006185	hypothetical protein	6.05667	3.91099
Sjc_0008775	hypothetical protein	5.32333	2.34214
Sjc_0006170	Similar to Serpinb12: Serpin B12 (Mus musculus OX%3D10090)	5.30333	2.35563
Sjc_0008624	Similar to so: Protein sine oculis (Drosophila melanogaster OX%3D7227)	5.29333	3.38187
Sjc_0002583	Similar to sgk1: Serine/threonine-protein kinase Sgk1 (Danio rerio OX%3D7955)	4.23333	3.71226
Sjc_0006882	Similar to unc-52: Basement membrane proteoglycan (Caenorhabditis elegans OX%3D6239)	2.24	2.48079
